# Supplementary material for: Congruence Gaps Between Adolescents With Cancer and Their Families Regarding Values, Goals, and Beliefs About End-of-Life Care
Source: PubMed Central journal article supplement (PMC7237980; doi:10.1001/jamanetworkopen.2020.5424), 2020-05-19
Supplement: jamanetwopen-3-e205424-s001.pdf [file jamanetwopen-3-e205424-s001.pdf]

## Supplementary Online Content

Friebert S, Grossoehme DH, Baker JN, et al. Congruence gaps between adolescents with cancer and their families regarding values, goals, and beliefs about end-of-life care. *JAMA Network Open*. 2020;3(5):e205424. doi:10.1001/jamanetworkopen.2020.5424

**eTable 1.** Comparison of Patients Enrolled in Study Versus Declined Participation in Study

**eTable 2.** Frequencies of Adolescent Responses for the Survey by Age Group at Session 1 (N=80)

**eTable 3.** Frequencies of Adolescent Responses for Survey by Gender at Session 1 (N=80)

**eTable 4.** Frequencies of Adolescent Responses for Survey by Race at Session 1 (N=79)

**eTable 5.** Frequencies of Adolescent Responses for Survey by Poverty at Session 1 (N=78)

**eTable 6.** The Congruence on End of Life Needs for Adolescents Living With Cancer Between Adolescents' and Families' Perception of What They Thought Their Adolescent Preferred (N=80 Dyads)

This supplementary material has been provided by the authors to give readers additional information about their work.

**eTable 1. Comparison of Participants Enrolled in Study Versus Declined Participation in Study**

| Variable                         | Eligible/<br>Participating<br>(N=130 dyads) | Eligible/<br>Declining to<br>participating<br>(N=203 dyads) | P-value <sup>a</sup> |
|----------------------------------|---------------------------------------------|-------------------------------------------------------------|----------------------|
| Adolescent Age                   |                                             | N=195                                                       | 0.165                |
| Mean (SD)                        | 17.0 (1.8)                                  | 16.7 (1.9)                                                  |                      |
| Surrogate Age                    |                                             | N=103                                                       | 0.994                |
| Mean (SD)                        | 46.0 (8.2)                                  | 46.0 (7.4)                                                  |                      |
|                                  | N (%)                                       | N (%)                                                       |                      |
| Adolescent Gender                |                                             | N=198                                                       | 0.015                |
| Female                           | 73 (56.2)                                   | 82 (41.4)                                                   |                      |
| Male                             | 57 (43.8)                                   | 115 (58.1)                                                  |                      |
| Declined                         | 0 (0.0)                                     | 1 (0.5)                                                     |                      |
| Family Gender                    |                                             | N=182                                                       | 0.488                |
| Female                           | 107 (82.3)                                  | 153 (84.1)                                                  |                      |
| Male                             | 23 (17.7)                                   | 27 (14.8)                                                   |                      |
| Declined                         | 0 (0.0)                                     | 2 (1.1)                                                     |                      |
| Adolescent Race                  |                                             | N=192                                                       | 0.183                |
| American Indian or Alaska Native | 0 (0.0)                                     | 1 (0.5)                                                     |                      |
| Asian                            | 3 (2.3)                                     | 4 (2.1)                                                     |                      |
| Black or African American        | 19 (14.6)                                   | 20 (10.4)                                                   |                      |
| White                            | 102 (78.5)                                  | 158 (82.3)                                                  |                      |
| More than one race               | 5 (3.8)                                     | 2 (1.0)                                                     |                      |
| Declined                         | 1 (0.8)                                     | 7 (3.6)                                                     |                      |
| Family Race                      |                                             | N=172                                                       | 0.006                |
| American Indian or Alaska Native | 1 (0.8)                                     | 1 (0.6)                                                     |                      |
| Asian                            | 3 (2.3)                                     | 2 (1.2)                                                     |                      |
| Black or African American        | 16 (12.3)                                   | 15 (8.7)                                                    |                      |
| White                            | 105 (80.8)                                  | 147 (85.5)                                                  |                      |
| More than one race               | 5 (3.8)                                     | 0 (0.0)                                                     |                      |
| Declined                         | 0 (0.0)                                     | 7 (4.1)                                                     |                      |
| Adolescent Ethnicity             |                                             | N=191                                                       | 0.885                |
| Hispanic or Latino               | 5 (3.8)                                     | 6 (3.1)                                                     |                      |
| Not Hispanic or Latino           | 120 (92.3)                                  | 176 (92.1)                                                  |                      |
| Declined                         | 5 (3.8)                                     | 9 (4.7)                                                     |                      |
| Family Ethnicity                 |                                             | N=173                                                       | 0.005                |
| Hispanic or Latino               | 4 (3.1)                                     | 2 (1.2)                                                     |                      |
| Not Hispanic or Latino           | 125 (96.2)                                  | 158 (91.3)                                                  |                      |
| Declined                         | 1 (0.8)                                     | 13 (7.5)                                                    |                      |
| Diagnosis                        | N=126                                       | N=191                                                       | 0.410                |
| Leukemia                         | 42 (33.3)                                   | 51 (26.7)                                                   |                      |
| Lymphoma                         | 19 (15.1)                                   | 39 (20.4)                                                   |                      |
| Solid Tumors                     | 34 (27.0)                                   | 47 (24.6)                                                   |                      |
| Brain Tumor                      | 25 (19.8)                                   | 38 (19.9)                                                   |                      |
| Other                            | 6 (4.8)                                     | 12 (6.3)                                                    |                      |
| Unknown                          | 0 (0.0)                                     | 4 (2.1)                                                     |                      |
| On Active Treatment              | N=126                                       | N=68 <sup>b</sup>                                           | 0.531                |
| Yes                              | 27 (21.4)                                   | 12 (17.6)                                                   |                      |
| No                               | 99 (78.6)                                   | 56 (82.4)                                                   |                      |

<sup>a</sup>: Two-sided p-values were reported from t-test, Pearson chi-square test and Fisher's exact test.

<sup>b</sup>: The data were collected partially because data collection on decliners started late on 07-11-2018.

| <b>eTable 2. Frequencies of Adolescent Responses for Survey by Age Group at Session 1 (N=80)</b>                                                                                       |                               |                             |                                 |                            |
|----------------------------------------------------------------------------------------------------------------------------------------------------------------------------------------|-------------------------------|-----------------------------|---------------------------------|----------------------------|
| <b>Question</b>                                                                                                                                                                        | <b>Age 14-17 years (N=42)</b> | <b>Age 18+ years (N=38)</b> | <b>All Ages Combined (N=80)</b> | <b>P-value<sup>a</sup></b> |
|                                                                                                                                                                                        | <b>N (%)</b>                  | <b>N (%)</b>                | <b>N (%)</b>                    |                            |
| 1. Have you ever written down any thoughts about your future health plans?                                                                                                             |                               |                             |                                 | 0.901                      |
| Yes, definitely                                                                                                                                                                        | 1 (2.4)                       | 2 (5.3)                     | 3 (3.8)                         |                            |
| Very probably                                                                                                                                                                          | 1 (2.4)                       | 0 (0.0)                     | 1 (1.3)                         |                            |
| Probably                                                                                                                                                                               | 2 (4.8)                       | 3 (7.9)                     | 5 (6.3)                         |                            |
| Probably not                                                                                                                                                                           | 7 (16.7)                      | 4 (10.5)                    | 11 (13.8)                       |                            |
| Definitely no                                                                                                                                                                          | 29 (69.0)                     | 27 (71.1)                   | 56 (70.0)                       |                            |
| Do not know                                                                                                                                                                            | 2 (4.8)                       | 2 (5.3)                     | 4 (5.0)                         |                            |
| 2a. Have you ever heard about and completed a Health Care Power of Attorney (HCPA), in which you name someone to make decisions about your health care in case you could not?          |                               |                             |                                 | 0.033                      |
| Have heard about and completed                                                                                                                                                         | 0 (0.0)                       | 2 (5.3)                     | 2 (2.5)                         |                            |
| Have heard about but not completed                                                                                                                                                     | 14 (33.3)                     | 22 (57.9)                   | 36 (45.0)                       |                            |
| Have not heard about                                                                                                                                                                   | 23 (54.8)                     | 12 (31.6)                   | 35 (43.8)                       |                            |
| Do not know                                                                                                                                                                            | 5 (11.9)                      | 2 (5.3)                     | 7 (8.8)                         |                            |
| 2b. Have you ever heard about and completed an Advance Directive or living will, such as the Five Wishes?                                                                              |                               |                             |                                 | 0.115                      |
| Have heard about and completed                                                                                                                                                         | 1 (2.4)                       | 1 (2.6)                     | 2 (2.5)                         |                            |
| Have heard about but not completed                                                                                                                                                     | 11 (26.2)                     | 19 (50.0)                   | 30 (37.5)                       |                            |
| Have not heard about                                                                                                                                                                   | 28 (66.7)                     | 16 (42.1)                   | 44 (55.0)                       |                            |
| Do not know                                                                                                                                                                            | 2 (4.8)                       | 2 (5.3)                     | 4 (5.0)                         |                            |
| 3a. Whether you have completed any advance directives/pre-plans or not, have you talked about your wishes for care at the end of life with anyone? Select all that apply. <sup>b</sup> |                               |                             |                                 |                            |
| Spouse/partner                                                                                                                                                                         | 0 (0.0)                       | 0 (0.0)                     | 0 (0.0)                         | -                          |
| Parents                                                                                                                                                                                | 13 (31.0)                     | 12 (31.6)                   | 25 (31.3)                       | 0.952                      |
| Siblings (brother/sister)                                                                                                                                                              | 2 (4.8)                       | 7 (18.4)                    | 9 (11.3)                        | 0.078                      |
| Friends                                                                                                                                                                                | 3 (7.1)                       | 6 (15.8)                    | 9 (11.3)                        | 0.296                      |
| Boyfriend/girlfriend                                                                                                                                                                   | 0 (0.0)                       | 4 (10.5)                    | 4 (5.0)                         | 0.047                      |
| Lawyer                                                                                                                                                                                 | 0 (0.0)                       | 0 (0.0)                     | 0 (0.0)                         | -                          |
| Primary physician                                                                                                                                                                      | 0 (0.0)                       | 1 (2.6)                     | 1 (1.3)                         | 0.475                      |
| Clergy (such as minister, rabbi, iman etc.)                                                                                                                                            | 0 (0.0)                       | 1 (2.6)                     | 1 (1.3)                         | 0.475                      |
| Other                                                                                                                                                                                  | 1 (2.4)                       | 0 (0.0)                     | 1 (1.3)                         | 1.000                      |
| Have not talked with anyone                                                                                                                                                            | 28 (66.7)                     | 22 (57.9)                   | 50 (62.5)                       | 0.418                      |
| 3b. Do you have any children?                                                                                                                                                          |                               |                             |                                 |                            |
| No                                                                                                                                                                                     | 42 (100.0)                    | 38 (100.0)                  | 80 (100.0)                      | -                          |
| 4. If you were very ill and knew that you would not get better, who would you want to be involved in decisions about your end-of-life care? Select all that apply. <sup>c</sup>        |                               |                             |                                 |                            |

**eTable 2. (continued) Frequencies of Adolescent Responses for Survey by Age Group at Session 1 (N=80)**

| Question                                                                                                                                                                                 | Age 14-17 years (N=42) | Age 18+ years (N=38) | All Ages Combined (N=80) | P-value <sup>a</sup> |
|------------------------------------------------------------------------------------------------------------------------------------------------------------------------------------------|------------------------|----------------------|--------------------------|----------------------|
|                                                                                                                                                                                          | N (%)                  | N (%)                | N (%)                    |                      |
| Myself                                                                                                                                                                                   | 31 (73.8)              | 22 (57.9)            | 53 (66.3)                | 0.133                |
| My family                                                                                                                                                                                | 40 (95.2)              | 37 (97.4)            | 77 (96.3)                | 1.000                |
| My doctor                                                                                                                                                                                | 24 (57.1)              | 22 (57.9)            | 46 (57.5)                | 0.946                |
| Someone else                                                                                                                                                                             | 5 (11.9)               | 3 (7.9)              | 8 (10.0)                 | 0.715                |
| 5. When do you think it is the best time to bring up end-of-life decisions?                                                                                                              |                        |                      |                          | 0.891                |
| Before getting sick, while healthy                                                                                                                                                       | 15 (35.7)              | 16 (42.1)            | 31 (38.8)                |                      |
| When first diagnosed with a life-threatening illness                                                                                                                                     | 5 (11.9)               | 7 (18.4)             | 12 (15.0)                |                      |
| When first sick from a life-threatening illness                                                                                                                                          | 3 (7.1)                | 3 (7.9)              | 6 (7.5)                  |                      |
| When first hospitalized with a life-threatening illness                                                                                                                                  | 1 (2.4)                | 0 (0.0)              | 4 (5.0)                  |                      |
| If dying                                                                                                                                                                                 | 2 (4.8)                | 2 (5.3)              | 3 (3.8)                  |                      |
| All of the above                                                                                                                                                                         | 1 (2.4)                | 2 (5.3)              | 20 (25.0)                |                      |
| Never                                                                                                                                                                                    | 13 (31.0)              | 7 (18.4)             | 1 (1.3)                  |                      |
| Other                                                                                                                                                                                    | 1 (2.4)                | 0 (0.0)              | 1 (1.3)                  |                      |
| Do not know                                                                                                                                                                              | 1 (2.4)                | 1 (2.6)              | 2 (2.5)                  |                      |
| 6. Who are the best people/best person on the treatment team to bring it up with you? Select all that apply. <sup>d</sup>                                                                |                        |                      |                          |                      |
| Physician                                                                                                                                                                                | 20 (47.6)              | 29 (76.3)            | 49 (61.3)                | 0.009                |
| Nurse practitioner                                                                                                                                                                       | 15 (35.7)              | 11 (28.9)            | 26 (32.5)                | 0.519                |
| Nurse                                                                                                                                                                                    | 14 (33.3)              | 10 (26.3)            | 24 (30.0)                | 0.494                |
| Social worker                                                                                                                                                                            | 9 (21.4)               | 14 (36.8)            | 23 (28.8)                | 0.128                |
| Psychologist                                                                                                                                                                             | 2 (4.8)                | 11 (28.9)            | 13 (16.3)                | 0.005                |
| Case manager                                                                                                                                                                             | 0 (0.0)                | 5 (13.2)             | 5 (6.3)                  | 0.021                |
| Chaplain                                                                                                                                                                                 | 3 (7.1)                | 2 (5.3)              | 5 (6.3)                  | 1                    |
| Patient advocate                                                                                                                                                                         | 4 (9.5)                | 3 (7.9)              | 7 (8.8)                  | 1                    |
| Other                                                                                                                                                                                    | 3 (7.1)                | 1 (2.6)              | 4 (5.0)                  | 0.617                |
| Do not know                                                                                                                                                                              | 7 (16.7)               | 4 (10.5)             | 11 (13.8)                | 0.525                |
| 7. Do you believe that once you make an important medical decision, for example, to be put on a respirator, a machine that breathes for you, that you would be able to change your mind? |                        |                      |                          | 0.395                |
| Yes, definitely                                                                                                                                                                          | 13 (31.0)              | 7 (18.4)             | 20 (25.0)                |                      |
| Very probably                                                                                                                                                                            | 5 (11.9)               | 6 (15.8)             | 11 (13.8)                |                      |
| Probably                                                                                                                                                                                 | 10 (23.8)              | 16 (42.1)            | 26 (32.5)                |                      |
| Probably not                                                                                                                                                                             | 9 (21.4)               | 6 (15.8)             | 15 (18.8)                |                      |
| Do not know                                                                                                                                                                              | 5 (11.9)               | 3 (7.9)              | 8 (10.0)                 |                      |
| 8. Do you think your doctor or the hospital will respect your wishes, that is, do what you want about medical care?                                                                      |                        |                      |                          | 0.686                |
| Yes, definitely                                                                                                                                                                          | 23 (54.8)              | 18 (47.4)            | 41 (51.3)                |                      |
| Very probably                                                                                                                                                                            | 11 (26.2)              | 9 (23.7)             | 20 (25.0)                |                      |

| <b>eTable 2. (continued) Frequencies of Adolescent Responses for Survey by Age Group at Session 1 (N=80)</b>                 |                               |                             |                                 |                            |
|------------------------------------------------------------------------------------------------------------------------------|-------------------------------|-----------------------------|---------------------------------|----------------------------|
| <b>Question</b>                                                                                                              | <b>Age 14-17 years (N=42)</b> | <b>Age 18+ years (N=38)</b> | <b>All Ages Combined (N=80)</b> | <b>P-value<sup>a</sup></b> |
|                                                                                                                              | <b>N (%)</b>                  | <b>N (%)</b>                | <b>N (%)</b>                    |                            |
| Probably                                                                                                                     | 4 (9.5)                       | 8 (21.1)                    | 12 (15.0)                       |                            |
| Probably not                                                                                                                 | 2 (4.8)                       | 2 (5.3)                     | 4 (5.0)                         |                            |
| Do not know                                                                                                                  | 2 (4.8)                       | 1 (2.6)                     | 3 (3.8)                         |                            |
| 9. Do you think your parent/guardian/surrogate understands your wishes?                                                      |                               |                             |                                 | 0.548                      |
| Yes, definitely                                                                                                              | 24 (58.5)                     | 17 (44.7)                   | 41 (51.9)                       |                            |
| Very probably                                                                                                                | 7 (17.1)                      | 7 (18.4)                    | 14 (17.7)                       |                            |
| Probably                                                                                                                     | 7 (17.1)                      | 8 (21.1)                    | 15 (19.0)                       |                            |
| Probably not                                                                                                                 | 1 (2.4)                       | 4 (10.5)                    | 5 (6.3)                         |                            |
| Definitely no                                                                                                                | 1 (2.4)                       | 0 (0.0)                     | 1 (1.3)                         |                            |
| Do not know                                                                                                                  | 1 (2.4)                       | 2 (5.3)                     | 3 (3.8)                         |                            |
| 10. Do you think your parent/guardian/surrogate will respect your wishes, that is, do what you want about your medical care? |                               |                             |                                 | 0.843                      |
| Yes, definitely                                                                                                              | 22 (52.4)                     | 19 (50.0)                   | 41 (51.3)                       |                            |
| Very probably                                                                                                                | 9 (21.4)                      | 9 (23.7)                    | 18 (22.5)                       |                            |
| Probably                                                                                                                     | 8 (19.0)                      | 6 (15.8)                    | 14 (17.5)                       |                            |
| Probably not                                                                                                                 | 1 (2.4)                       | 3 (7.9)                     | 4 (5.0)                         |                            |
| Do not know                                                                                                                  | 2 (4.8)                       | 1 (2.6)                     | 3 (3.8)                         |                            |
| 11. How often has death and dying been talked about in your family?                                                          |                               |                             |                                 | 0.421                      |
| Very often                                                                                                                   | 0 (0.0)                       | 2 (5.3)                     | 2 (2.5)                         |                            |
| Often                                                                                                                        | 5 (11.9)                      | 7 (18.4)                    | 12 (15.0)                       |                            |
| Occasionally                                                                                                                 | 13 (31.0)                     | 13 (34.2)                   | 26 (35.5)                       |                            |
| Rarely                                                                                                                       | 19 (45.2)                     | 13 (34.2)                   | 32 (40.0)                       |                            |
| Never                                                                                                                        | 4 (9.5)                       | 1 (2.6)                     | 5 (6.3)                         |                            |
| Do not know                                                                                                                  | 1 (2.4)                       | 2 (5.3)                     | 3 (3.8)                         |                            |
| 12. How comfortable are you talking about death?                                                                             |                               |                             |                                 | 0.013                      |
| Very comfortable                                                                                                             | 5 (11.9)                      | 12 (31.6)                   | 17 (21.3)                       |                            |
| Somewhat comfortable                                                                                                         | 15 (35.7)                     | 18 (47.4)                   | 33 (41.3)                       |                            |
| Neither comfortable or uncomfortable                                                                                         | 9 (21.4)                      | 7 (18.4)                    | 16 (20.0)                       |                            |
| Not very comfortable                                                                                                         | 6 (14.3)                      | 1 (2.6)                     | 7 (8.8)                         |                            |
| Not at all comfortable                                                                                                       | 5 (11.9)                      | 0 (0.0)                     | 5 (6.3)                         |                            |
| Do not know                                                                                                                  | 2 (4.8)                       | 0 (0.0)                     | 2 (2.5)                         |                            |
| 13. How likely are you to?                                                                                                   |                               |                             |                                 |                            |
| 13a. Attend funerals or memorial services when a loved one, friend or classmate dies                                         |                               |                             |                                 | 0.847                      |
| Very likely                                                                                                                  | 31 (73.8)                     | 30 (78.9)                   | 61 (76.3)                       |                            |
| Somewhat likely                                                                                                              | 7 (16.7)                      | 5 (13.2)                    | 12 (15.0)                       |                            |

| <b>eTable 2. (continued) Frequencies of Adolescent Responses for Survey by Age Group at Session 1 (N=80)</b>      |                               |                             |                                 |                            |
|-------------------------------------------------------------------------------------------------------------------|-------------------------------|-----------------------------|---------------------------------|----------------------------|
| <b>Question</b>                                                                                                   | <b>Age 14-17 years (N=42)</b> | <b>Age 18+ years (N=38)</b> | <b>All Ages Combined (N=80)</b> | <b>P-value<sup>a</sup></b> |
|                                                                                                                   | <b>N (%)</b>                  | <b>N (%)</b>                | <b>N (%)</b>                    |                            |
| Neither likely or unlikely                                                                                        | 1 (2.4)                       | 1 (2.6)                     | 2 (2.5)                         |                            |
| Not very likely                                                                                                   | 0 (0.0)                       | 1 (2.6)                     | 1 (1.3)                         |                            |
| Not at all likely                                                                                                 | 1 (2.4)                       | 1 (2.6)                     | 2 (2.5)                         |                            |
| Do not know                                                                                                       | 2 (4.8)                       | 0 (0.0)                     | 2 (2.5)                         |                            |
| 13b. Avoid medical checkups because you are afraid the doctor will find "something serious"                       |                               |                             |                                 | 0.025                      |
| Very likely                                                                                                       | 2 (4.8)                       | 0 (0.0)                     | 2 (2.5)                         |                            |
| Somewhat likely                                                                                                   | 5 (11.9)                      | 6 (15.8)                    | 11 (13.8)                       |                            |
| Neither likely or unlikely                                                                                        | 1 (2.4)                       | 2 (5.3)                     | 3 (3.8)                         |                            |
| Not very likely                                                                                                   | 2 (4.8)                       | 10 (26.3)                   | 12 (15.0)                       |                            |
| Not at all likely                                                                                                 | 31 (73.8)                     | 20 (52.6)                   | 51 (63.8)                       |                            |
| Do not know                                                                                                       | 1 (2.4)                       | 0 (0.0)                     | 1 (1.3)                         |                            |
| 13c. Speak freely to loved ones about death and dying                                                             |                               |                             |                                 | 0.656                      |
| Very likely                                                                                                       | 6 (14.3)                      | 11 (28.9)                   | 17 (21.3)                       |                            |
| Somewhat likely                                                                                                   | 16 (38.1)                     | 13 (34.2)                   | 29 (36.3)                       |                            |
| Neither likely or unlikely                                                                                        | 10 (23.8)                     | 7 (18.4)                    | 17 (21.3)                       |                            |
| Not very likely                                                                                                   | 4 (9.5)                       | 4 (10.5)                    | 8 (10.0)                        |                            |
| Not at all likely                                                                                                 | 5 (11.9)                      | 3 (7.9)                     | 8 (10.0)                        |                            |
| Do not know                                                                                                       | 1 (2.4)                       | 0 (0.0)                     | 1 (1.3)                         |                            |
| 13d. Visit or telephone a friend or relative who has recently lost a loved one in order to see how they are doing |                               |                             |                                 | 1.000                      |
| Very likely                                                                                                       | 30 (71.4)                     | 28 (73.7)                   | 58 (72.5)                       |                            |
| Somewhat likely                                                                                                   | 9 (21.4)                      | 8 (21.1)                    | 17 (21.3)                       |                            |
| Neither likely or unlikely                                                                                        | 2 (4.8)                       | 1 (2.6)                     | 3 (3.8)                         |                            |
| Not very likely                                                                                                   | 1 (2.4)                       | 1 (2.6)                     | 2 (2.5)                         |                            |
| 13e. Preplan your own funeral, for example, choose someone to speak or choose the music you would want            |                               |                             |                                 | 0.350                      |
| Very likely                                                                                                       | 16 (38.1)                     | 10 (26.3)                   | 26 (32.5)                       |                            |
| Somewhat likely                                                                                                   | 8 (19.0)                      | 7 (18.4)                    | 15 (18.8)                       |                            |
| Neither likely or unlikely                                                                                        | 7 (16.7)                      | 6 (15.8)                    | 13 (16.3)                       |                            |
| Not very likely                                                                                                   | 4 (9.5)                       | 6 (15.8)                    | 10 (12.5)                       |                            |
| Not at all likely                                                                                                 | 3 (7.1)                       | 8 (21.1)                    | 11 (13.8)                       |                            |
| Do not know                                                                                                       | 4 (9.5)                       | 1 (2.6)                     | 5 (6.3)                         |                            |
| 14. How afraid, if at all, are you of?                                                                            |                               |                             |                                 |                            |
| 14a. Dying from a long term illness                                                                               |                               |                             |                                 | 0.206                      |
| Very afraid                                                                                                       | 7 (16.7)                      | 2 (5.3)                     | 9 (11.3)                        |                            |
| Somewhat afraid                                                                                                   | 11 (26.2)                     | 14 (36.8)                   | 25 (31.3)                       |                            |
| Neither afraid nor not afraid                                                                                     | 3 (7.1)                       | 7 (18.4)                    | 10 (12.5)                       |                            |

| <b>eTable 2. (continued) Frequencies of Adolescent Responses for Survey by Age Group at Session 1 (N=80)</b> |                               |                             |                                 |                            |
|--------------------------------------------------------------------------------------------------------------|-------------------------------|-----------------------------|---------------------------------|----------------------------|
| <b>Question</b>                                                                                              | <b>Age 14-17 years (N=42)</b> | <b>Age 18+ years (N=38)</b> | <b>All Ages Combined (N=80)</b> | <b>P-value<sup>a</sup></b> |
|                                                                                                              | <b>N (%)</b>                  | <b>N (%)</b>                | <b>N (%)</b>                    |                            |
| Not very afraid                                                                                              | 8 (19.0)                      | 9 (23.7)                    | 17 (21.3)                       |                            |
| Not at all afraid                                                                                            | 11 (26.2)                     | 5 (13.2)                    | 16 (20.0)                       |                            |
| Do not know                                                                                                  | 2 (4.8)                       | 1 (2.6)                     | 3 (3.8)                         |                            |
| <b>14b. Dying suddenly, such as an accident, or being killed:</b>                                            |                               |                             |                                 | <b>0.030</b>               |
| Very afraid                                                                                                  | 12 (28.6)                     | 2 (5.3)                     | 14 (17.5)                       |                            |
| Somewhat afraid                                                                                              | 14 (33.3)                     | 11 (28.9)                   | 25 (31.3)                       |                            |
| Neither afraid nor not afraid                                                                                | 4 (9.5)                       | 10 (26.3)                   | 14 (17.5)                       |                            |
| Not very afraid                                                                                              | 6 (14.3)                      | 8 (21.1)                    | 14 (17.5)                       |                            |
| Not at all afraid                                                                                            | 5 (11.9)                      | 7 (18.4)                    | 12 (15.0)                       |                            |
| Do not know                                                                                                  | 1 (2.4)                       | 0 (0.0)                     | 1 (1.3)                         |                            |
| <b>14c. Dying alone</b>                                                                                      |                               |                             |                                 | <b>0.420</b>               |
| Very afraid                                                                                                  | 15 (35.7)                     | 9 (23.7)                    | 24 (30.0)                       |                            |
| Somewhat afraid                                                                                              | 5 (11.9)                      | 10 (26.3)                   | 15 (18.8)                       |                            |
| Neither afraid nor not afraid                                                                                | 7 (16.7)                      | 6 (15.8)                    | 13 (16.3)                       |                            |
| Not very afraid                                                                                              | 4 (9.5)                       | 6 (15.8)                    | 10 (12.5)                       |                            |
| Not at all afraid                                                                                            | 10 (23.8)                     | 7 (18.4)                    | 17 (21.3)                       |                            |
| Do not know                                                                                                  | 1 (2.4)                       | 0 (0.0)                     | 1 (1.3)                         |                            |
| <b>14d. Dying in an institution such as a nursing home or hospital</b>                                       |                               |                             |                                 | <b>0.169</b>               |
| Very afraid                                                                                                  | 7 (16.7)                      | 6 (15.8)                    | 13 (16.3)                       |                            |
| Somewhat afraid                                                                                              | 8 (19.0)                      | 4 (10.5)                    | 12 (15.0)                       |                            |
| Neither afraid nor not afraid                                                                                | 5 (11.9)                      | 10 (26.3)                   | 15 (18.8)                       |                            |
| Not very afraid                                                                                              | 6 (14.3)                      | 10 (26.3)                   | 16 (20.0)                       |                            |
| Not at all afraid                                                                                            | 13 (31.0)                     | 8 (21.1)                    | 21 (26.3)                       |                            |
| Do not know                                                                                                  | 3 (7.1)                       | 0 (0.0)                     | 3 (3.8)                         |                            |
| <b>14e. Dying painfully</b>                                                                                  |                               |                             |                                 | <b>0.865</b>               |
| Very afraid                                                                                                  | 15 (35.7)                     | 12 (31.6)                   | 27 (33.8)                       |                            |
| Somewhat afraid                                                                                              | 14 (33.3)                     | 12 (31.6)                   | 26 (32.5)                       |                            |
| Neither afraid nor not afraid                                                                                | 4 (9.5)                       | 3 (7.9)                     | 7 (8.8)                         |                            |
| Not very afraid                                                                                              | 3 (7.1)                       | 6 (15.8)                    | 9 (11.3)                        |                            |
| Not at all afraid                                                                                            | 5 (11.9)                      | 5 (13.2)                    | 10 (12.5)                       |                            |
| Do not know                                                                                                  | 1 (2.4)                       | 0 (0.0)                     | 1 (1.3)                         |                            |
| <b>15. How strongly do you agree or disagree that?</b>                                                       |                               |                             |                                 |                            |
| <b>15a. Dying is an important part of life</b>                                                               |                               |                             |                                 | <b>0.181</b>               |
| Strongly agree                                                                                               | 13 (31.0)                     | 20 (52.6)                   | 33 (41.3)                       |                            |
| Agree                                                                                                        | 20 (47.6)                     | 10 (26.3)                   | 30 (37.5)                       |                            |
| Neither agree or disagree                                                                                    | 5 (11.9)                      | 4 (10.5)                    | 9 (11.3)                        |                            |
| Disagree                                                                                                     | 3 (7.1)                       | 3 (7.9)                     | 6 (7.5)                         |                            |

| <b>eTable 2. (continued) Frequencies of Adolescent Responses for Survey by Age Group at Session 1 (N=80)</b>               |                               |                             |                                 |                            |
|----------------------------------------------------------------------------------------------------------------------------|-------------------------------|-----------------------------|---------------------------------|----------------------------|
| <b>Question</b>                                                                                                            | <b>Age 14-17 years (N=42)</b> | <b>Age 18+ years (N=38)</b> | <b>All Ages Combined (N=80)</b> | <b>P-value<sup>a</sup></b> |
|                                                                                                                            | <b>N (%)</b>                  | <b>N (%)</b>                | <b>N (%)</b>                    |                            |
| Strongly disagree                                                                                                          | 1 (2.4)                       | 0 (0.0)                     | 1 (1.3)                         |                            |
| Do not know                                                                                                                | 0 (0.0)                       | 1 (2.6)                     | 1 (1.3)                         |                            |
| 15b. If someone could tell me when I would die, I would want to know.                                                      |                               |                             |                                 | 0345                       |
| Strongly agree                                                                                                             | 11 (26.2)                     | 5 (13.2)                    | 16 (20.0)                       |                            |
| Agree                                                                                                                      | 9 (21.4)                      | 5 (13.2)                    | 14 (17.5)                       |                            |
| Neither agree or disagree                                                                                                  | 5 (11.9)                      | 5 (13.2)                    | 10 (12.5)                       |                            |
| Disagree                                                                                                                   | 3 (7.1)                       | 8 (21.1)                    | 11 (13.8)                       |                            |
| Strongly disagree                                                                                                          | 12 (28.6)                     | 12 (31.6)                   | 24 (30.0)                       |                            |
| Do not know                                                                                                                | 2 (4.8)                       | 3 (7.9)                     | 5 (6.3)                         |                            |
| 16. When you think about death and dying, how concerned are you that?                                                      |                               |                             |                                 |                            |
| 16a. The family's money won't last:                                                                                        |                               |                             |                                 | 0.371                      |
| Very concerned                                                                                                             | 3 (7.1)                       | 0 (0.0)                     | 3 (3.8)                         |                            |
| Concerned                                                                                                                  | 9 (21.4)                      | 11 (28.9)                   | 20 (25.0)                       |                            |
| Neither concerned nor unconcerned                                                                                          | 12 (28.6)                     | 9 (23.7)                    | 21 (26.3)                       |                            |
| Not concerned                                                                                                              | 5 (11.9)                      | 8 (21.1)                    | 13 (16.3)                       |                            |
| Not at all concerned                                                                                                       | 9 (21.4)                      | 9 (23.7)                    | 18 (22.5)                       |                            |
| Do not know                                                                                                                | 4 (9.5)                       | 1 (2.6)                     | 5 (6.3)                         |                            |
| 16b. I will be a burden to, or overload, my family or friends.                                                             |                               |                             |                                 | 0.050                      |
| Very concerned                                                                                                             | 5 (11.9)                      | 8 (21.1)                    | 13 (16.3)                       |                            |
| Concerned                                                                                                                  | 16 (38.1)                     | 11 (28.9)                   | 27 (33.8)                       |                            |
| Neither concerned nor unconcerned                                                                                          | 7 (16.7)                      | 0 (0.0)                     | 7 (8.8)                         |                            |
| Not concerned                                                                                                              | 7 (16.7)                      | 12 (31.6)                   | 19 (23.8)                       |                            |
| Not at all concerned                                                                                                       | 6 (14.3)                      | 5 (13.2)                    | 11 (13.8)                       |                            |
| Do not know                                                                                                                | 1 (2.4)                       | 2 (5.3)                     | 3 (3.8)                         |                            |
| 17. Which of the following health problems, if any, do you think are worse than death? Select all that apply. <sup>e</sup> |                               |                             |                                 |                            |
| Living with great pain                                                                                                     | 18 (42.9)                     | 15 (39.5)                   | 33 (41.3)                       | 0.759                      |
| Total physical dependency on others, for example, being in a wheelchair                                                    | 11 (26.2)                     | 12 (31.6)                   | 23 (28.8)                       | 0.595                      |
| Not being able to communicate my wishes and/or care to family members, for example, being in a coma Checked                | 22 (52.4)                     | 26 (68.4)                   | 48 (60.0)                       | 0.144                      |
| None are worse than death                                                                                                  | 12 (28.6)                     | 9 (23.7)                    | 21 (26.3)                       | 0.620                      |
| 18. How important would each of the following be to you if you were dealing with your own dying?                           |                               |                             |                                 |                            |
| 18a. Family/friends visiting you                                                                                           |                               |                             |                                 | 0.518                      |
| Very important                                                                                                             | 34 (81.0)                     | 35 (92.1)                   | 69 (86.3)                       |                            |



| <b>eTable 2. (continued) Frequencies of Adolescent Responses for Survey by Age Group at Session 1 (N=80)</b>                                  |                               |                             |                                 |                            |
|-----------------------------------------------------------------------------------------------------------------------------------------------|-------------------------------|-----------------------------|---------------------------------|----------------------------|
| <b>Question</b>                                                                                                                               | <b>Age 14-17 years (N=42)</b> | <b>Age 18+ years (N=38)</b> | <b>All Ages Combined (N=80)</b> | <b>P-value<sup>a</sup></b> |
|                                                                                                                                               | <b>N (%)</b>                  | <b>N (%)</b>                | <b>N (%)</b>                    |                            |
| Somewhat important                                                                                                                            | 6 (14.3)                      | 2 (5.3)                     | 8 (10.0)                        |                            |
| Neither important nor unimportant                                                                                                             | 1 (2.4)                       | 1 (2.6)                     | 2 (2.5)                         |                            |
| Do not know                                                                                                                                   | 1 (2.4)                       | 0 (0.0)                     | 1 (1.3)                         |                            |
| <b>18b. Being able to stay in your own home</b>                                                                                               |                               |                             |                                 | <b>0.533</b>               |
| Very important                                                                                                                                | 15 (35.7)                     | 12 (31.6)                   | 27 (33.8)                       |                            |
| Somewhat important                                                                                                                            | 16 (38.1)                     | 18 (47.4)                   | 34 (42.5)                       |                            |
| Neither important nor unimportant                                                                                                             | 5 (11.9)                      | 2 (5.3)                     | 7 (8.8)                         |                            |
| Not very important                                                                                                                            | 5 (11.9)                      | 4 (10.5)                    | 9 (11.3)                        |                            |
| Not at all important                                                                                                                          | 0 (0.0)                       | 2 (5.3)                     | 2 (2.5)                         |                            |
| Do not know                                                                                                                                   | 1 (2.4)                       | 0 (0.0)                     | 1 (1.3)                         |                            |
| <b>18c. Honest answers from your doctor</b>                                                                                                   |                               |                             |                                 | <b>0.602</b>               |
| Very important                                                                                                                                | 41 (97.6)                     | 36 (94.7)                   | 77 (96.3)                       |                            |
| Somewhat important                                                                                                                            | 1 (2.4)                       | 2 (5.3)                     | 3 (3.8)                         |                            |
| <b>18d. Comfort from church services or persons such as a minister, priest, imam, or rabbi</b>                                                |                               |                             |                                 | <b>0.701</b>               |
| Very important                                                                                                                                | 18 (42.9)                     | 12 (31.6)                   | 30 (37.5)                       |                            |
| Somewhat important                                                                                                                            | 9 (21.4)                      | 13 (34.2)                   | 22 (27.5)                       |                            |
| Neither important nor unimportant                                                                                                             | 4 (9.5)                       | 5 (13.2)                    | 9 (11.3)                        |                            |
| Not very important                                                                                                                            | 3 (7.1)                       | 3 (7.9)                     | 6 (7.5)                         |                            |
| Not at all important                                                                                                                          | 7 (16.7)                      | 5 (13.2)                    | 12 (15.0)                       |                            |
| Do not know                                                                                                                                   | 1 (2.4)                       | 0 (0.0)                     | 1 (1.3)                         |                            |
| <b>18e. Planning your own funeral</b>                                                                                                         |                               |                             |                                 | <b>0.109</b>               |
| Very important                                                                                                                                | 11 (26.2)                     | 5 (13.2)                    | 16 (20.0)                       |                            |
| Somewhat important                                                                                                                            | 13 (31.0)                     | 14 (36.8)                   | 27 (33.8)                       |                            |
| Neither important nor unimportant                                                                                                             | 11 (26.2)                     | 8 (21.1)                    | 19 (23.8)                       |                            |
| Not very important                                                                                                                            | 3 (7.1)                       | 9 (23.7)                    | 12 (15.0)                       |                            |
| Not at all important                                                                                                                          | 1 (2.4)                       | 2 (5.3)                     | 3 (3.8)                         |                            |
| Do not know                                                                                                                                   | 3 (7.1)                       | 0 (0.0)                     | 3 (3.8)                         |                            |
| <b>18f. Being able to complete an advance directive that would let loved ones know your wishes, if you were unable to speak for yourself.</b> |                               |                             |                                 | <b>0.072</b>               |
| Very important                                                                                                                                | 24 (57.1)                     | 19 (50.0)                   | 43 (53.8)                       |                            |
| Somewhat important                                                                                                                            | 11 (26.2)                     | 17 (44.7)                   | 28 (35.0)                       |                            |
| Neither important nor unimportant                                                                                                             | 2 (4.8)                       | 2 (5.3)                     | 4 (5.0)                         |                            |
| Do not know                                                                                                                                   | 5 (11.9)                      | 0 (0.0)                     | 5 (6.3)                         |                            |
| <b>18g. Fulfilling personal goals/pleasures</b>                                                                                               |                               |                             |                                 | <b>0.575</b>               |
| Very important                                                                                                                                | 27 (64.3)                     | 28 (73.7)                   | 55 (68.8)                       |                            |
| Somewhat important                                                                                                                            | 12 (28.6)                     | 10 (26.3)                   | 22 (27.5)                       |                            |

| <b>eTable 2. (continued) Frequencies of Adolescent Responses for Survey by Age Group at Session 1 (N=80)</b> |                               |                             |                                 |                            |
|--------------------------------------------------------------------------------------------------------------|-------------------------------|-----------------------------|---------------------------------|----------------------------|
| <b>Question</b>                                                                                              | <b>Age 14-17 years (N=42)</b> | <b>Age 18+ years (N=38)</b> | <b>All Ages Combined (N=80)</b> | <b>P-value<sup>a</sup></b> |
|                                                                                                              | <b>N (%)</b>                  | <b>N (%)</b>                | <b>N (%)</b>                    |                            |
| Neither important nor unimportant                                                                            | 2 (4.8)                       | 0 (0.0)                     | 2 (2.5)                         |                            |
| Not very important                                                                                           | 1 (2.4)                       | 0 (0.0)                     | 1 (1.3)                         |                            |
| 18h. Reviewing your life history with your family                                                            |                               |                             |                                 | 0.049                      |
| Very important                                                                                               | 23 (54.8)                     | 11 (28.9)                   | 34 (42.5)                       |                            |
| Somewhat important                                                                                           | 8 (19.0)                      | 15 (39.5)                   | 23 (28.8)                       |                            |
| Neither important nor unimportant                                                                            | 5 (11.9)                      | 9 (23.7)                    | 14 (17.5)                       |                            |
| Not very important                                                                                           | 5 (11.9)                      | 3 (7.9)                     | 8 (10.0)                        |                            |
| Do not know                                                                                                  | 1 (2.4)                       | 0 (0.0)                     | 1 (1.3)                         |                            |
| 18i. Having health care professionals visit you at your home                                                 |                               |                             |                                 | 0.737                      |
| Very important                                                                                               | 12 (28.6)                     | 12 (31.6)                   | 24 (30.0)                       |                            |
| Somewhat important                                                                                           | 17 (40.5)                     | 17 (44.7)                   | 34 (42.5)                       |                            |
| Neither important nor unimportant                                                                            | 10 (23.8)                     | 8 (21.1)                    | 18 (22.5)                       |                            |
| Not very important                                                                                           | 2 (4.8)                       | 0 (0.0)                     | 2 (2.5)                         |                            |
| Not at all important                                                                                         | 0 (0.0)                       | 1 (2.6)                     | 1 (1.3)                         |                            |
| Do not know                                                                                                  | 1 (2.4)                       | 0 (0.0)                     | 1 (1.3)                         |                            |
| 18j. Understanding your treatment choices                                                                    |                               |                             |                                 | 0.498                      |
| Very important                                                                                               | 38 (90.5)                     | 35 (92.1)                   | 73 (91.3)                       |                            |
| Somewhat important                                                                                           | 2 (4.8)                       | 3 (7.9)                     | 5 (6.3)                         |                            |
| Do not know                                                                                                  | 2 (4.8)                       | 0 (0.0)                     | 2 (2.5)                         |                            |
| 19. How important are each of the following is to you when you think about dying?                            |                               |                             |                                 |                            |
| 19a. Being physically comfortable                                                                            |                               |                             |                                 | 0.189                      |
| Very important                                                                                               | 27 (64.3)                     | 22 (57.9)                   | 49 (61.3)                       |                            |
| Somewhat important                                                                                           | 13 (31.0)                     | 11 (28.9)                   | 24 (30.0)                       |                            |
| Neither important nor unimportant                                                                            | 0 (0.0)                       | 4 (10.5)                    | 4 (5.0)                         |                            |
| Not very important                                                                                           | 1 (2.4)                       | 0 (0.0)                     | 1 (1.3)                         |                            |
| Not at all important                                                                                         | 1 (2.4)                       | 1 (2.6)                     | 2 (2.5)                         |                            |
| 19b. Being free from pain                                                                                    |                               |                             |                                 | 0.138                      |
| Very important                                                                                               | 27 (64.3)                     | 24 (63.2)                   | 51 (63.8)                       |                            |
| Somewhat important                                                                                           | 11 (26.2)                     | 7 (18.4)                    | 18 (22.5)                       |                            |
| Neither important nor unimportant                                                                            | 0 (0.0)                       | 5 (13.2)                    | 5 (6.3)                         |                            |
| Not very important                                                                                           | 2 (4.8)                       | 1 (2.6)                     | 3 (3.8)                         |                            |
| Not at all important                                                                                         | 1 (2.4)                       | 1 (2.6)                     | 2 (2.5)                         |                            |
| Do not know                                                                                                  | 1 (2.4)                       | 0 (0.0)                     | 1 (1.3)                         |                            |
| 19c. Saying everything I want to say to people in my family                                                  |                               |                             |                                 | 0.383                      |
| Very important                                                                                               | 31 (75.6)                     | 32 (84.2)                   | 63 (79.8)                       |                            |
| Somewhat important                                                                                           | 9 (22.0)                      | 5 (13.2)                    | 14 (17.7)                       |                            |
| Neither important nor unimportant                                                                            | 0 (0.0)                       | 1 (2.6)                     | 1 (1.3)                         |                            |

| <b>eTable 2. (continued) Frequencies of Adolescent Responses for Survey by Age Group at Session 1 (N=80)</b> |                               |                             |                                 |                            |
|--------------------------------------------------------------------------------------------------------------|-------------------------------|-----------------------------|---------------------------------|----------------------------|
| <b>Question</b>                                                                                              | <b>Age 14-17 years (N=42)</b> | <b>Age 18+ years (N=38)</b> | <b>All Ages Combined (N=80)</b> | <b>P-value<sup>a</sup></b> |
|                                                                                                              | <b>N (%)</b>                  | <b>N (%)</b>                | <b>N (%)</b>                    |                            |
| Not at all important                                                                                         | 1 (2.4)                       | 0 (0.0)                     | 1 (1.3)                         |                            |
| 19d. Being at peace spiritually                                                                              |                               |                             |                                 | 0.761                      |
| Very important                                                                                               | 29 (69.0)                     | 30 (78.9)                   | 59 (73.8)                       |                            |
| Somewhat important                                                                                           | 9 (21.4)                      | 6 (15.8)                    | 15 (18.8)                       |                            |
| Neither important nor unimportant                                                                            | 1 (2.4)                       | 1 (2.6)                     | 2 (2.5)                         |                            |
| Not very important                                                                                           | 1 (2.4)                       | 1 (2.6)                     | 2 (2.5)                         |                            |
| Do not know                                                                                                  | 2 (4.8)                       | 0 (0.0)                     | 2 (2.5)                         |                            |
| 19e. Not being a burden to loved ones                                                                        |                               |                             |                                 | 0.988                      |
| Very important                                                                                               | 28 (66.7)                     | 26 (68.4)                   | 54 (67.5)                       |                            |
| Somewhat important                                                                                           | 8 (19.0)                      | 7 (18.4)                    | 15 (18.8)                       |                            |
| Neither important nor unimportant                                                                            | 3 (7.1)                       | 2 (5.3)                     | 5 (6.3)                         |                            |
| Not very important                                                                                           | 1 (2.4)                       | 2 (5.3)                     | 3 (3.8)                         |                            |
| Do not know                                                                                                  | 2 (4.8)                       | 1 (2.6)                     | 3 (3.8)                         |                            |
| 19f. Knowing how to say good bye                                                                             |                               |                             |                                 | 1.000                      |
| Very important                                                                                               | 31 (73.8)                     | 28 (73.7)                   | 59 (73.8)                       |                            |
| Somewhat important                                                                                           | 6 (14.3)                      | 6 (15.8)                    | 12 (15.0)                       |                            |
| Neither important nor unimportant                                                                            | 2 (4.8)                       | 2 (5.3)                     | 4 (5.0)                         |                            |
| Not very important                                                                                           | 1 (2.4)                       | 1 (2.6)                     | 2 (2.5)                         |                            |
| Do not know                                                                                                  | 2 (4.8)                       | 1 (2.6)                     | 3 (3.8)                         |                            |
| 19g. Having a sense of my own worth or value                                                                 |                               |                             |                                 | 0.086                      |
| Very important                                                                                               | 30 (71.4)                     | 19 (50.0)                   | 49 (61.3)                       |                            |
| Somewhat important                                                                                           | 8 (19.0)                      | 15 (39.5)                   | 23 (28.8)                       |                            |
| Neither important nor unimportant                                                                            | 1 (2.4)                       | 3 (7.9)                     | 4 (5.0)                         |                            |
| Do not know                                                                                                  | 3 (7.1)                       | 1 (2.6)                     | 4 (5.0)                         |                            |
| 19h. Being off machines that extend life, such as life support.                                              |                               |                             |                                 | 0.879                      |
| Very important                                                                                               | 13 (31.0)                     | 10 (26.3)                   | 23 (28.8)                       |                            |
| Somewhat important                                                                                           | 15 (35.7)                     | 10 (26.3)                   | 25 (31.3)                       |                            |
| Neither important nor unimportant                                                                            | 9 (21.4)                      | 12 (31.6)                   | 21 (26.3)                       |                            |
| Not very important                                                                                           | 2 (4.8)                       | 2 (5.3)                     | 4 (5.0)                         |                            |
| Not at all important                                                                                         | 1 (2.4)                       | 1 (2.6)                     | 2 (2.5)                         |                            |
| Do not know                                                                                                  | 2 (4.8)                       | 3 (7.9)                     | 5 (6.3)                         |                            |
| 19i. Dying a natural death                                                                                   |                               |                             |                                 | 0.230                      |
| Very important                                                                                               | 16 (38.1)                     | 9 (23.7)                    | 25 (31.3)                       |                            |
| Somewhat important                                                                                           | 12 (28.6)                     | 11 (28.9)                   | 23 (28.8)                       |                            |
| Neither important nor unimportant                                                                            | 9 (21.4)                      | 11 (28.9)                   | 20 (25.0)                       |                            |
| Not very important                                                                                           | 4 (9.5)                       | 2 (5.3)                     | 6 (7.5)                         |                            |
| Not at all important                                                                                         | 1 (2.4)                       | 1 (2.6)                     | 2 (2.5)                         |                            |

**eTable 2. (continued) Frequencies of Adolescent Responses for Survey by Age Group at Session 1 (N=80)**

| Question                                                                                                                                                          | Age 14-17 years (N=42) | Age 18+ years (N=38) | All Ages Combined (N=80) | P-value <sup>a</sup> |
|-------------------------------------------------------------------------------------------------------------------------------------------------------------------|------------------------|----------------------|--------------------------|----------------------|
|                                                                                                                                                                   | N (%)                  | N (%)                | N (%)                    |                      |
| Do not know                                                                                                                                                       | 0 (0.0)                | 4 (10.5)             | 4 (5.0)                  |                      |
| 20. If death were likely to happen in the next few weeks, and you could choose where to die, where would you MOST want to die?                                    |                        |                      |                          | 0.743                |
| At home without hospice                                                                                                                                           | 13 (31.0)              | 10 (26.3)            | 23 (28.8)                |                      |
| At home in hospice                                                                                                                                                | 9 (21.4)               | 11 (28.9)            | 20 (25.0)                |                      |
| In a hospital                                                                                                                                                     | 7 (16.7)               | 3 (7.9)              | 10 (12.5)                |                      |
| No preference                                                                                                                                                     | 6 (14.3)               | 6 (15.8)             | 12 (15.0)                |                      |
| Do not know                                                                                                                                                       | 7 (16.7)               | 8 (21.1)             | 15 (18.8)                |                      |
| 21. Below are some statements related to pain near the end-of-life that have been expressed by people. How strongly do you agree or disagree with each statement? |                        |                      |                          |                      |
| 21a. I am afraid the doctor may not believe I am in pain and treat my pain                                                                                        |                        |                      |                          | 0.127                |
| Strongly agree                                                                                                                                                    | 1 (2.4)                | 1 (2.6)              | 2 (2.5)                  |                      |
| Agree                                                                                                                                                             | 8 (19.0)               | 5 (13.2)             | 13 (16.3)                |                      |
| Neither agree or disagree                                                                                                                                         | 2 (4.8)                | 8 (21.1)             | 10 (12.5)                |                      |
| Disagree                                                                                                                                                          | 14 (33.3)              | 16 (42.1)            | 30 (37.5)                |                      |
| Strongly disagree                                                                                                                                                 | 12 (28.6)              | 7 (18.4)             | 19 (23.8)                |                      |
| Do not know                                                                                                                                                       | 5 (11.9)               | 1 (2.6)              | 6 (7.5)                  |                      |
| 21b. I would only take pain medicines when the pain is severe                                                                                                     |                        |                      |                          | 0.051                |
| Strongly agree                                                                                                                                                    | 16 (38.1)              | 9 (23.7)             | 25 (31.3)                |                      |
| Agree                                                                                                                                                             | 15 (35.7)              | 13 (34.2)            | 28 (35.0)                |                      |
| Neither agree or disagree                                                                                                                                         | 6 (14.3)               | 4 (10.5)             | 10 (12.5)                |                      |
| Disagree                                                                                                                                                          | 3 (7.1)                | 12 (31.6)            | 15 (18.8)                |                      |
| Strongly disagree                                                                                                                                                 | 1 (2.4)                | 0 (0.0)              | 1 (1.3)                  |                      |
| Do not know                                                                                                                                                       | 1 (2.4)                | 0 (0.0)              | 1 (1.3)                  |                      |
| 21c. I am afraid I will become addicted to the pain medicines over time                                                                                           |                        |                      |                          | 0.214                |
| Strongly agree                                                                                                                                                    | 0 (0.0)                | 3 (7.9)              | 3 (3.8)                  |                      |
| Agree                                                                                                                                                             | 8 (19.0)               | 9 (23.7)             | 17 (21.3)                |                      |
| Neither agree or disagree                                                                                                                                         | 1 (2.4)                | 4 (10.5)             | 5 (6.3)                  |                      |
| Disagree                                                                                                                                                          | 15 (35.7)              | 9 (23.7)             | 24 (30.0)                |                      |
| Strongly disagree                                                                                                                                                 | 15 (35.7)              | 12 (31.6)            | 27 (33.8)                |                      |
| Do not know                                                                                                                                                       | 3 (7.1)                | 1 (2.6)              | 4 (5.0)                  |                      |
| 21d. I would take the lowest amount of medicine possible to save larger doses for later when the pain is worse                                                    |                        |                      |                          | 0.543                |
| Strongly agree                                                                                                                                                    | 10 (23.8)              | 5 (13.2)             | 15 (18.8)                |                      |
| Agree                                                                                                                                                             | 17 (40.5)              | 14 (36.8)            | 31 (38.8)                |                      |
| Neither agree or disagree                                                                                                                                         | 6 (14.3)               | 6 (15.8)             | 12 (15.0)                |                      |

**eTable 2. (continued) Frequencies of Adolescent Responses for Survey by Age Group at Session 1 (N=80)**

| Question                                                                                                      | Age 14-17 years (N=42) | Age 18+ years (N=38) | All Ages Combined (N=80) | P-value <sup>a</sup> |
|---------------------------------------------------------------------------------------------------------------|------------------------|----------------------|--------------------------|----------------------|
|                                                                                                               | N (%)                  | N (%)                | N (%)                    |                      |
| Disagree                                                                                                      | 5 (11.9)               | 6 (15.8)             | 11 (13.8)                |                      |
| Strongly disagree                                                                                             | 2 (4.8)                | 6 (15.8)             | 8 (10.0)                 |                      |
| Do not know                                                                                                   | 2 (4.8)                | 1 (2.6)              | 3 (3.8)                  |                      |
| 21e. I am afraid I would be given too much pain medicine                                                      |                        |                      |                          | 0.378                |
| Strongly agree                                                                                                | 1 (2.4)                | 5 (13.2)             | 6 (7.5)                  |                      |
| Agree                                                                                                         | 10 (23.8)              | 4 (10.5)             | 14 (17.5)                |                      |
| Neither agree or disagree                                                                                     | 5 (11.9)               | 5 (13.2)             | 10 (12.5)                |                      |
| Disagree                                                                                                      | 15 (35.7)              | 14 (36.8)            | 29 (36.3)                |                      |
| Strongly disagree                                                                                             | 9 (21.4)               | 9 (23.7)             | 18 (22.5)                |                      |
| Do not know                                                                                                   | 2 (4.8)                | 1 (2.6)              | 3 (3.8)                  |                      |
| 22. Have you heard of hospice services?                                                                       |                        |                      |                          | 0.003                |
| Yes                                                                                                           | 23 (54.8)              | 33 (86.8)            | 56 (70.0)                |                      |
| No                                                                                                            | 19 (45.2)              | 5 (13.2)             | 24 (30.0)                |                      |
| 23. How did you learn about hospice services? (N=56)                                                          |                        |                      |                          | 0.295                |
| I know someone who used hospice services                                                                      | 9 (39.1)               | 20 (60.6)            | 29 (51.8)                |                      |
| I heard from a health care professional                                                                       | 3 (13.0)               | 1 (3.0)              | 4 (7.1)                  |                      |
| I read literature/newspaper/TV/radio/other media                                                              | 3 (13.0)               | 4 (12.1)             | 7 (12.5)                 |                      |
| I heard from others                                                                                           | 8 (34.8)               | 8 (24.2)             | 16 (28.6)                |                      |
| 24. If you were dying, would you want hospice support? (N=56)                                                 |                        |                      |                          | 1.000                |
| Yes                                                                                                           | 10 (43.5)              | 14 (42.4)            | 24 (42.9)                |                      |
| No                                                                                                            | 2 (8.7)                | 4 (12.1)             | 6 (10.7)                 |                      |
| Don't know/not sure                                                                                           | 11 (47.8)              | 15 (45.5)            | 26 (46.4)                |                      |
| 25. Do you consider yourself religious/spiritual?                                                             |                        |                      |                          | 0.129                |
| Very religious/spiritual                                                                                      | 11 (26.2)              | 10 (26.3)            | 21 (26.3)                |                      |
| Somewhat religious/spiritual                                                                                  | 16 (38.1)              | 23 (60.5)            | 39 (48.8)                |                      |
| Not very religious/spiritual                                                                                  | 6 (14.3)               | 3 (7.9)              | 9 (11.3)                 |                      |
| Not religious/spiritual                                                                                       | 8 (19.0)               | 2 (5.3)              | 10 (12.5)                |                      |
| Declined                                                                                                      | 1 (2.4)                | 0 (0.0)              | 1 (1.3)                  |                      |
| 26. How often do you attend religious or spiritual services? (N=69)                                           |                        |                      |                          | 0.504                |
| Always                                                                                                        | 4 (12.1)               | 2 (5.6)              | 6 (8.7)                  |                      |
| Very often                                                                                                    | 8 (24.2)               | 8 (22.2)             | 16 (23.2)                |                      |
| Sometimes                                                                                                     | 16 (48.5)              | 16 (44.4)            | 32 (46.4)                |                      |
| Rarely                                                                                                        | 5 (15.2)               | 7 (19.4)             | 12 (17.4)                |                      |
| Never                                                                                                         | 0 (0.0)                | 3 (8.3)              | 3 (4.4)                  |                      |
| 27. How often does religion or spirituality help you face your fears or do what you were afraid to do? (N=69) |                        |                      |                          | 0.670                |
| Everyday                                                                                                      | 11 (33.3)              | 7 (19.4)             | 18 (26.1)                |                      |

**eTable 2. (continued) Frequencies of Adolescent Responses for Survey by Age Group at Session 1 (N=80)**

| Question                                        | Age 14-17 years (N=42) | Age 18+ years (N=38) | All Ages Combined (N=80) | P-value <sup>a</sup> |
|-------------------------------------------------|------------------------|----------------------|--------------------------|----------------------|
|                                                 | N (%)                  | N (%)                | N (%)                    |                      |
| A few times a week                              | 8 (24.2)               | 9 (25.0)             | 17 (24.6)                |                      |
| A few times a month                             | 8 (24.2)               | 10 (27.8)            | 18 (26.1)                |                      |
| Rarely                                          | 4 (12.1)               | 8 (22.2)             | 12 (17.4)                |                      |
| Never                                           | 2 (6.1)                | 2 (5.6)              | 4 (5.8)                  |                      |
| 30. HOW MANY NIGHTS did you stay in a hospital? |                        |                      |                          | 0.498                |
| 0                                               | 38 (90.5)              | 33 (86.8)            | 71 (88.8)                |                      |
| 1-2                                             | 1 (2.4)                | 0 (0.0)              | 1 (1.3)                  |                      |
| 3-5                                             | 1 (2.4)                | 3 (7.9)              | 4 (5.0)                  |                      |
| 6-10                                            | 2 (4.8)                | 1 (2.6)              | 3 (3.8)                  |                      |
| >20                                             | 0 (0.0)                | 1 (2.6)              | 1 (1.3)                  |                      |
| 31. How healthy are you feeling right now?      |                        |                      |                          | 0.453                |
| Excellent health                                | 13 (31.0)              | 9 (23.7)             | 22 (27.5)                |                      |
| Very good health                                | 18 (42.9)              | 13 (34.2)            | 31 (38.8)                |                      |
| Good health                                     | 6 (14.3)               | 9 (23.7)             | 15 (18.8)                |                      |
| Fair health                                     | 4 (9.5)                | 5 (13.2)             | 9 (11.3)                 |                      |
| Poor health                                     | 0 (0.0)                | 2 (5.3)              | 2 (2.5)                  |                      |
| Declined                                        | 1 (2.4)                | 0 (0.0)              | 1 (1.3)                  |                      |
| 32a. Is your mother alive?                      |                        |                      |                          | 1.000                |
| Yes                                             | 41 (97.6)              | 38 (100.0)           | 79 (98.8)                |                      |
| No                                              | 1 (2.4)                | 0 (0.0)              | 1 (1.3)                  |                      |
| 32b. Is your father alive?                      |                        |                      |                          |                      |
| Yes                                             | 37 (88.1)              | 36 (94.7)            | 73 (91.3)                | 0.678                |
| No                                              | 3 (7.1)                | 2 (5.3)              | 5 (6.3)                  |                      |
| Do not know                                     | 2 (4.8)                | 0 (0.0)              | 2 (2.5)                  |                      |

<sup>a</sup> Pearson chi-square test or Fisher' exact test.

<sup>b</sup> Bonferroni corrected significant level is 0.05/8=0.006.

<sup>c</sup> Bonferroni corrected significant level is 0.05/4=0.013

<sup>d</sup> Bonferroni corrected significant level is 0.05/10=0.005.

<sup>e</sup> Bonferroni corrected significant level is 0.05/4=0.013.

**eTable 3. Frequencies of Adolescent Responses for Survey by Gender at Session 1 (N=80)**

| Question                                                                                                                                                                               | Female<br>(N=44) | Male<br>(N=36) | P-value <sup>a</sup> |
|----------------------------------------------------------------------------------------------------------------------------------------------------------------------------------------|------------------|----------------|----------------------|
|                                                                                                                                                                                        | N (%)            | N (%)          |                      |
| 1. Have you ever written down any thoughts about your future health plans?                                                                                                             |                  |                | 0.334                |
| Yes, definitely                                                                                                                                                                        | 3 (6.8)          | 0 (0.0)        |                      |
| Very probably                                                                                                                                                                          | 0 (0.0)          | 1 (2.8)        |                      |
| Probably                                                                                                                                                                               | 4 (9.1)          | 1 (2.8)        |                      |
| Probably not                                                                                                                                                                           | 6 (13.6)         | 5 (13.9)       |                      |
| Definitely no                                                                                                                                                                          | 28 (63.6)        | 28 (77.8)      |                      |
| Do not know                                                                                                                                                                            | 3 (6.8)          | 1 (2.8)        |                      |
| 2a. Have you ever heard about and completed a Health Care Power of Attorney (HCPA), in which you name someone to make decisions about your health care in case you could not?          |                  |                | 0.069                |
| Have heard about and completed                                                                                                                                                         | 2 (4.5)          | 0 (0.0)        |                      |
| Have heard about but not completed                                                                                                                                                     | 24 (54.5)        | 12 (33.3)      |                      |
| Have not heard about                                                                                                                                                                   | 16 (36.4)        | 19 (52.8)      |                      |
| Do not know                                                                                                                                                                            | 2 (4.5)          | 5 (13.9)       |                      |
| 2b. Have you ever heard about and completed an Advance Directive or living will, such as the Five Wishes?                                                                              |                  |                | 0.007                |
| Have heard about and completed                                                                                                                                                         | 1 (2.3)          | 1 (2.8)        |                      |
| Have heard about but not completed                                                                                                                                                     | 22 (50.0)        | 8 (22.2)       |                      |
| Have not heard about                                                                                                                                                                   | 21 (47.7)        | 23 (63.9)      |                      |
| Do not know                                                                                                                                                                            | 0 (0.0)          | 4 (11.1)       |                      |
| 3a. Whether you have completed any advance directives/pre-plans or not, have you talked about your wishes for care at the end of life with anyone? Select all that apply. <sup>b</sup> |                  |                |                      |
| Spouse/partner                                                                                                                                                                         | 0 (0.0)          | 0 (0.0)        | -                    |
| Parents                                                                                                                                                                                | 12 (27.3)        | 13 (36.1)      | 0.396                |
| Siblings (brother/sister)                                                                                                                                                              | 4 (9.1)          | 5 (13.9)       | 0.724                |
| Friends                                                                                                                                                                                | 6 (13.6)         | 3 (8.3)        | 0.504                |
| Boyfriend/girlfriend                                                                                                                                                                   | 3 (6.8)          | 1 (2.8)        | 0.623                |
| Lawyer                                                                                                                                                                                 | 0 (0.0)          | 0 (0.0)        | -                    |
| Primary physician                                                                                                                                                                      | 1 (2.3)          | 0 (0.0)        | 1.000                |
| Clergy (such as minister, rabbi, iman etc.)                                                                                                                                            | 1 (2.3)          | 0 (0.0)        | 1.000                |
| Other                                                                                                                                                                                  | 0 (0.0)          | 1 (2.8)        | 0.45                 |
| Have not talked with anyone                                                                                                                                                            | 31 (70.5)        | 19 (52.8)      | 0.104                |
| 3b. Do you have any children?                                                                                                                                                          |                  |                | -                    |
| No                                                                                                                                                                                     | 44 (100.0)       | 36 (100.0)     |                      |
| 4. If you were very ill and knew that you would not get better, who would you want to be involved in decisions about your end-of-life care? Select all that apply. <sup>c</sup>        |                  |                |                      |

**eTable 3. (continued) Frequencies of Adolescent Responses for Survey by Gender at Session 1 (N=80)**

| Question                                                                                                                                                                                 | Female<br>(N=44) | Male<br>(N=36) | P-value <sup>a</sup> |
|------------------------------------------------------------------------------------------------------------------------------------------------------------------------------------------|------------------|----------------|----------------------|
|                                                                                                                                                                                          | N (%)            | N (%)          |                      |
| Myself                                                                                                                                                                                   | 30 (68.2)        | 23 (63.9)      | 0.686                |
| My family                                                                                                                                                                                | 42 (95.5)        | 35 (97.2)      | 1.000                |
| My doctor                                                                                                                                                                                | 26 (59.1)        | 20 (55.6)      | 0.750                |
| Someone else                                                                                                                                                                             | 5 (11.4)         | 3 (8.3)        | 0.724                |
| 5. When do you think it is the best time to bring up end-of-life decisions?                                                                                                              |                  |                | 0.352                |
| Before getting sick, while healthy                                                                                                                                                       | 18 (40.9)        | 13 (36.1)      |                      |
| When first diagnosed with a life-threatening illness                                                                                                                                     | 4 (9.1)          | 8 (22.2)       |                      |
| When first sick from a life-threatening illness                                                                                                                                          | 4 (9.1)          | 2 (5.6)        |                      |
| When first hospitalized with a life-threatening illness                                                                                                                                  | 0 (0.0)          | 1 (2.8)        |                      |
| If dying                                                                                                                                                                                 | 4 (9.1)          | 0 (0.0)        |                      |
| All of the above                                                                                                                                                                         | 1 (2.3)          | 2 (5.6)        |                      |
| Never                                                                                                                                                                                    | 11 (25.0)        | 9 (25.0)       |                      |
| Other                                                                                                                                                                                    | 1 (2.3)          | 0 (0.0)        |                      |
| Do not know                                                                                                                                                                              | 1 (2.3)          | 1 (2.8)        |                      |
| 6. Who are the best people/best person on the treatment team to bring it up with you? Select all that apply. <sup>d</sup>                                                                |                  |                |                      |
| Physician                                                                                                                                                                                | 28 (63.6)        | 21 (58.3)      | 0.628                |
| Nurse practitioner                                                                                                                                                                       | 14 (31.8)        | 12 (33.3)      | 0.886                |
| Nurse                                                                                                                                                                                    | 16 (36.4)        | 8 (22.2)       | 0.170                |
| Social worker                                                                                                                                                                            | 16 (36.4)        | 7 (19.4)       | 0.096                |
| Psychologist                                                                                                                                                                             | 7 (15.9)         | 6 (16.7)       | 0.927                |
| Case manager                                                                                                                                                                             | 3 (6.8)          | 2 (5.6)        | 1.000                |
| Chaplain                                                                                                                                                                                 | 2 (4.5)          | 3 (8.3)        | 0.653                |
| Patient advocate                                                                                                                                                                         | 5 (11.4)         | 2 (5.6)        | 0.449                |
| Other                                                                                                                                                                                    | 1 (2.3)          | 3 (8.3)        | 0.322                |
| Do not know                                                                                                                                                                              | 7 (15.9)         | 4 (11.1)       | 0.746                |
| 7. Do you believe that once you make an important medical decision, for example, to be put on a respirator, a machine that breathes for you, that you would be able to change your mind? |                  |                | 0.079                |
| Yes, definitely                                                                                                                                                                          | 9 (20.5)         | 11 (30.6)      |                      |
| Very probably                                                                                                                                                                            | 10 (22.7)        | 1 (2.8)        |                      |
| Probably                                                                                                                                                                                 | 15 (34.1)        | 11 (30.6)      |                      |
| Probably not                                                                                                                                                                             | 7 (15.9)         | 8 (22.2)       |                      |
| Do not know                                                                                                                                                                              | 3 (6.8)          | 5 (13.9)       |                      |
| 8. Do you think your doctor or the hospital will respect your wishes, that is, do what you want about medical care?                                                                      |                  |                | 0.102                |
| Yes, definitely                                                                                                                                                                          | 27 (61.4)        | 14 (38.9)      |                      |
| Very probably                                                                                                                                                                            | 8 (18.2)         | 12 (33.3)      |                      |



**eTable 3. (continued) Frequencies of Adolescent Responses for Survey by Gender at Session 1 (N=80)**

| Question                                                                                                                     | Female<br>(N=44) | Male<br>(N=36) | P-value <sup>a</sup> |
|------------------------------------------------------------------------------------------------------------------------------|------------------|----------------|----------------------|
|                                                                                                                              | N (%)            | N (%)          |                      |
| Probably                                                                                                                     | 7 (15.9)         | 5 (13.9)       |                      |
| Probably not                                                                                                                 | 2 (4.5)          | 2 (5.6)        |                      |
| Do not know                                                                                                                  | 0 (0.0)          | 3 (8.3)        |                      |
| 9. Do you think your parent/guardian/surrogate understands your wishes?                                                      |                  |                | 0.919                |
| Yes, definitely                                                                                                              | 22 (51.2)        | 19 (52.8)      |                      |
| Very probably                                                                                                                | 8 (18.6)         | 6 (16.7)       |                      |
| Probably                                                                                                                     | 9 (20.9)         | 6 (16.7)       |                      |
| Probably not                                                                                                                 | 2 (4.7)          | 3 (8.3)        |                      |
| Definitely no                                                                                                                | 1 (2.3)          | 0 (0.0)        |                      |
| Do not know                                                                                                                  | 1 (2.3)          | 2 (5.6)        |                      |
| 10. Do you think your parent/guardian/surrogate will respect your wishes, that is, do what you want about your medical care? |                  |                | 0.156                |
| Yes, definitely                                                                                                              | 27 (61.4)        | 14 (38.9)      |                      |
| Very probably                                                                                                                | 8 (18.2)         | 10 (27.8)      |                      |
| Probably                                                                                                                     | 7 (15.9)         | 7 (19.4)       |                      |
| Probably not                                                                                                                 | 2 (4.5)          | 2 (5.6)        |                      |
| Do not know                                                                                                                  | 0 (0.0)          | 3 (8.3)        |                      |
| 11. How often has death and dying been talked about in your family?                                                          |                  |                | 0.301                |
| Very often                                                                                                                   | 0 (0.0)          | 2 (5.6)        |                      |
| Often                                                                                                                        | 5 (11.4)         | 7 (19.4)       |                      |
| Occasionally                                                                                                                 | 18 (40.9)        | 8 (22.2)       |                      |
| Rarely                                                                                                                       | 17 (38.6)        | 15 (41.7)      |                      |
| Never                                                                                                                        | 3 (6.8)          | 2 (5.6)        |                      |
| Do not know                                                                                                                  | 1 (2.3)          | 2 (5.6)        |                      |
| 12. How comfortable are you talking about death?                                                                             |                  |                | 0.178                |
| Very comfortable                                                                                                             | 10 (22.7)        | 7 (19.4)       |                      |
| Somewhat comfortable                                                                                                         | 19 (43.2)        | 14 (38.9)      |                      |
| Neither comfortable or uncomfortable                                                                                         | 8 (18.2)         | 8 (22.2)       |                      |
| Not very comfortable                                                                                                         | 1 (2.3)          | 6 (16.7)       |                      |
| Not at all comfortable                                                                                                       | 4 (9.1)          | 1 (2.8)        |                      |
| Do not know                                                                                                                  | 2 (4.5)          | 0 (0.0)        |                      |
| 13. How likely are you to?                                                                                                   |                  |                |                      |
| 13a. Attend funerals or memorial services when a loved one, friend or classmate dies                                         |                  |                | 0.558                |
| Very likely                                                                                                                  | 34 (77.3)        | 27 (75.0)      |                      |
| Somewhat likely                                                                                                              | 8 (18.2)         | 4 (11.1)       |                      |
| Neither likely or unlikely                                                                                                   | 0 (0.0)          | 2 (5.6)        |                      |

**eTable 3. (continued) Frequencies of Adolescent Responses for Survey by Gender at Session 1 (N=80)**

| Question                                                                                                          | Female<br>(N=44) | Male<br>(N=36) | P-value <sup>a</sup> |
|-------------------------------------------------------------------------------------------------------------------|------------------|----------------|----------------------|
|                                                                                                                   | N (%)            | N (%)          |                      |
| Not very likely                                                                                                   | 0 (0.0)          | 1 (2.8)        |                      |
| Not at all likely                                                                                                 | 1 (2.3)          | 1 (2.8)        |                      |
| Do not know                                                                                                       | 1 (2.3)          | 1 (2.8)        |                      |
| 13b. Avoid medical checkups because you are afraid the doctor will find "something serious"                       |                  |                | 0.662                |
| Very likely                                                                                                       | 1 (2.3)          | 1 (2.8)        |                      |
| Somewhat likely                                                                                                   | 6 (13.6)         | 5 (13.9)       |                      |
| Neither likely or unlikely                                                                                        | 1 (2.3)          | 2 (5.6)        |                      |
| Not very likely                                                                                                   | 5 (11.4)         | 7 (19.4)       |                      |
| Not at all likely                                                                                                 | 31 (70.5)        | 20 (55.6)      |                      |
| Do not know                                                                                                       | 0 (0.0)          | 1 (2.8)        |                      |
| 13c. Speak freely to loved ones about death and dying                                                             |                  |                | 0.977                |
| Very likely                                                                                                       | 9 (20.5)         | 8 (22.2)       |                      |
| Somewhat likely                                                                                                   | 16 (36.4)        | 13 (36.1)      |                      |
| Neither likely or unlikely                                                                                        | 8 (18.2)         | 9 (25.0)       |                      |
| Not very likely                                                                                                   | 5 (11.4)         | 3 (8.3)        |                      |
| Not at all likely                                                                                                 | 5 (11.4)         | 3 (8.3)        |                      |
| Do not know                                                                                                       | 1 (2.3)          | 0 (0.0)        |                      |
| 13d. Visit or telephone a friend or relative who has recently lost a loved one in order to see how they are doing |                  |                | 0.877                |
| Very likely                                                                                                       | 33 (75.0)        | 25 (69.4)      |                      |
| Somewhat likely                                                                                                   | 9 (20.5)         | 8 (22.2)       |                      |
| Neither likely or unlikely                                                                                        | 1 (2.3)          | 2 (5.6)        |                      |
| Not very likely                                                                                                   | 1 (2.3)          | 1 (2.8)        |                      |
| 13e. Preplan your own funeral, for example, choose someone to speak or choose the music you would want            |                  |                | 0.799                |
| Very likely                                                                                                       | 14 (31.8)        | 12 (33.3)      |                      |
| Somewhat likely                                                                                                   | 10 (22.7)        | 5 (13.9)       |                      |
| Neither likely or unlikely                                                                                        | 8 (18.2)         | 5 (13.9)       |                      |
| Not very likely                                                                                                   | 4 (9.1)          | 6 (16.7)       |                      |
| Not at all likely                                                                                                 | 6 (13.6)         | 5 (13.9)       |                      |
| Do not know                                                                                                       | 2 (4.5)          | 3 (8.3)        |                      |
| 14. How afraid, if at all, are you of?                                                                            |                  |                |                      |
| 14a. Dying from a long term illness                                                                               |                  |                | 0.359                |
| Very afraid                                                                                                       | 7 (15.9)         | 2 (5.6)        |                      |
| Somewhat afraid                                                                                                   | 11 (25.0)        | 14 (38.9)      |                      |
| Neither afraid nor not afraid                                                                                     | 4 (9.1)          | 6 (16.7)       |                      |
| Not very afraid                                                                                                   | 11 (25.0)        | 6 (16.7)       |                      |
| Not at all afraid                                                                                                 | 10 (22.7)        | 6 (16.7)       |                      |

**eTable 3. (continued) Frequencies of Adolescent Responses for Survey by Gender at Session 1 (N=80)**

| Question                                                        | Female<br>(N=44) | Male<br>(N=36) | P-value <sup>a</sup> |
|-----------------------------------------------------------------|------------------|----------------|----------------------|
|                                                                 | N (%)            | N (%)          |                      |
| Do not know                                                     | 1 (2.3)          | 2 (5.6)        |                      |
| 14b. Dying suddenly, such as an accident, or being killed:      |                  |                | 0.794                |
| Very afraid                                                     | 6 (13.6)         | 8 (22.2)       |                      |
| Somewhat afraid                                                 | 16 (36.4)        | 9 (25.0)       |                      |
| Neither afraid nor not afraid                                   | 7 (15.9)         | 7 (19.4)       |                      |
| Not very afraid                                                 | 8 (18.2)         | 6 (16.7)       |                      |
| Not at all afraid                                               | 6 (13.6)         | 6 (16.7)       |                      |
| Do not know                                                     | 1 (2.3)          | 0 (0.0)        |                      |
| 14c. Dying alone                                                |                  |                | 0.922                |
| Very afraid                                                     | 13 (29.5)        | 11 (30.6)      |                      |
| Somewhat afraid                                                 | 9 (20.5)         | 6 (16.7)       |                      |
| Neither afraid nor not afraid                                   | 6 (13.6)         | 7 (19.4)       |                      |
| Not very afraid                                                 | 6 (13.6)         | 4 (11.1)       |                      |
| Not at all afraid                                               | 10 (22.7)        | 7 (19.4)       |                      |
| Do not know                                                     | 0 (0.0)          | 1 (2.8)        |                      |
| 14d. Dying in an institution such as a nursing home or hospital |                  |                | 0.911                |
| Very afraid                                                     | 7 (15.9)         | 6 (16.7)       |                      |
| Somewhat afraid                                                 | 6 (13.6)         | 6 (16.7)       |                      |
| Neither afraid nor not afraid                                   | 10 (22.7)        | 5 (13.9)       |                      |
| Not very afraid                                                 | 9 (20.5)         | 7 (19.4)       |                      |
| Not at all afraid                                               | 10 (22.7)        | 11 (30.6)      |                      |
| Do not know                                                     | 2 (4.5)          | 1 (2.8)        |                      |
| 14e. Dying painfully                                            |                  |                | 0.194                |
| Very afraid                                                     | 12 (27.3)        | 15 (41.7)      |                      |
| Somewhat afraid                                                 | 18 (40.9)        | 8 (22.2)       |                      |
| Neither afraid nor not afraid                                   | 3 (6.8)          | 4 (11.1)       |                      |
| Not very afraid                                                 | 3 (6.8)          | 6 (16.7)       |                      |
| Not at all afraid                                               | 7 (15.9)         | 3 (8.3)        |                      |
| Do not know                                                     | 1 (2.3)          | 0 (0.0)        |                      |
| 15. How strongly do you agree or disagree that?                 |                  |                |                      |
| 15a. Dying is an important part of life                         |                  |                | 0.145                |
| Strongly agree                                                  | 18 (40.9)        | 15 (41.7)      |                      |
| Agree                                                           | 20 (45.5)        | 10 (27.8)      |                      |
| Neither agree or disagree                                       | 4 (9.1)          | 5 (13.9)       |                      |
| Disagree                                                        | 1 (2.3)          | 5 (13.9)       |                      |
| Strongly disagree                                               | 0 (0.0)          | 1 (2.8)        |                      |
| Do not know                                                     | 1 (2.3)          | 0 (0.0)        |                      |

| 15b. If someone could tell me when I would die, I would want to know.                                                      |                  |                | 0.406                |
|----------------------------------------------------------------------------------------------------------------------------|------------------|----------------|----------------------|
| <b>eTable 3. (continued) Frequencies of Adolescent Responses for Survey by Gender at Session 1 (N=80)</b>                  |                  |                |                      |
| Question                                                                                                                   | Female<br>(N=44) | Male<br>(N=36) | P-value <sup>a</sup> |
|                                                                                                                            | N (%)            | N (%)          |                      |
| Strongly agree                                                                                                             | 7 (15.9)         | 9 (25.0)       |                      |
| Agree                                                                                                                      | 8 (18.2)         | 6 (16.7)       |                      |
| Neither agree or disagree                                                                                                  | 8 (18.2)         | 2 (5.6)        |                      |
| Disagree                                                                                                                   | 5 (11.4)         | 6 (16.7)       |                      |
| Strongly disagree                                                                                                          | 12 (27.3)        | 12 (33.3)      |                      |
| Do not know                                                                                                                | 4 (9.1)          | 1 (2.8)        |                      |
| 16. When you think about death and dying, how concerned are you that?                                                      |                  |                |                      |
| 16a. The family's money won't last:                                                                                        |                  |                | 0.289                |
| Very concerned                                                                                                             | 2 (4.5)          | 1 (2.8)        |                      |
| Concerned                                                                                                                  | 10 (22.7)        | 10 (27.8)      |                      |
| Neither concerned nor unconcerned                                                                                          | 15 (34.1)        | 6 (16.7)       |                      |
| Not concerned                                                                                                              | 6 (13.6)         | 7 (19.4)       |                      |
| Not at all concerned                                                                                                       | 7 (15.9)         | 11 (30.6)      |                      |
| Do not know                                                                                                                | 4 (9.1)          | 1 (2.8)        |                      |
| 16b. I will be a burden to, or overload, my family or friends.                                                             |                  |                | 0.394                |
| Very concerned                                                                                                             | 7 (15.9)         | 6 (16.7)       |                      |
| Concerned                                                                                                                  | 18 (40.9)        | 9 (25.0)       |                      |
| Neither concerned nor unconcerned                                                                                          | 5 (11.4)         | 2 (5.6)        |                      |
| Not concerned                                                                                                              | 8 (18.2)         | 11 (30.6)      |                      |
| Not at all concerned                                                                                                       | 4 (9.1)          | 7 (19.4)       |                      |
| Do not know                                                                                                                | 2 (4.5)          | 1 (2.8)        |                      |
| 17. Which of the following health problems, if any, do you think are worse than death? Select all that apply. <sup>e</sup> |                  |                |                      |
| Living with great pain                                                                                                     | 21 (47.7)        | 12 (33.3)      | 0.193                |
| Total physical dependency on others, for example, being in a wheelchair                                                    | 15 (34.1)        | 8 (22.2)       | 0.243                |
| Not being able to communicate my wishes and/or care to family members, for example, being in a coma Checked                | 27 (61.4)        | 21 (58.3)      | 0.783                |
| None are worse than death                                                                                                  | 10 (22.7)        | 11 (30.6)      | 0.429                |
| 18. How important would each of the following be to you if you were dealing with your own dying?                           |                  |                |                      |
| 18a. Family/friends visiting you                                                                                           |                  |                | 0.512                |
| Very important                                                                                                             | 40 (90.9)        | 29 (80.6)      |                      |
| Somewhat important                                                                                                         | 3 (6.8)          | 5 (13.9)       |                      |
| Neither important nor unimportant                                                                                          | 1 (2.3)          | 1 (2.8)        |                      |
| Do not know                                                                                                                | 0 (0.0)          | 1 (2.8)        |                      |

| 18b. Being able to stay in your own home                                                                                               |                  |                | 0.231                |
|----------------------------------------------------------------------------------------------------------------------------------------|------------------|----------------|----------------------|
| <b>eTable 3. (continued) Frequencies of Adolescent Responses for Survey by Gender at Session 1 (N=80)</b>                              |                  |                |                      |
| Question                                                                                                                               | Female<br>(N=44) | Male<br>(N=36) | P-value <sup>a</sup> |
|                                                                                                                                        | N (%)            | N (%)          |                      |
| Very important                                                                                                                         | 14 (31.8)        | 13 (36.1)      |                      |
| Somewhat important                                                                                                                     | 22 (50.0)        | 12 (33.3)      |                      |
| Neither important nor unimportant                                                                                                      | 4 (9.1)          | 3 (8.3)        |                      |
| Not very important                                                                                                                     | 2 (4.5)          | 7 (19.4)       |                      |
| Not at all important                                                                                                                   | 1 (2.3)          | 1 (2.8)        |                      |
| Do not know                                                                                                                            | 1 (2.3)          | 0 (0.0)        |                      |
| 18c. Honest answers from your doctor                                                                                                   |                  |                | 0.586                |
| Very important                                                                                                                         | 43 (97.7)        | 34 (94.4)      |                      |
| Somewhat important                                                                                                                     | 1 (2.3)          | 2 (5.6)        |                      |
| 18d. Comfort from church services or persons such as a minister, priest, imam, or rabbi                                                |                  |                | 0.619                |
| Very important                                                                                                                         | 19 (43.2)        | 11 (30.6)      |                      |
| Somewhat important                                                                                                                     | 11 (25.0)        | 11 (30.6)      |                      |
| Neither important nor unimportant                                                                                                      | 6 (13.6)         | 3 (8.3)        |                      |
| Not very important                                                                                                                     | 3 (6.8)          | 3 (8.3)        |                      |
| Not at all important                                                                                                                   | 5 (11.4)         | 7 (19.4)       |                      |
| Do not know                                                                                                                            | 0 (0.0)          | 1 (2.8)        |                      |
| 18e. Planning your own funeral                                                                                                         |                  |                | 0.485                |
| Very important                                                                                                                         | 10 (22.7)        | 6 (16.7)       |                      |
| Somewhat important                                                                                                                     | 17 (38.6)        | 10 (27.8)      |                      |
| Neither important nor unimportant                                                                                                      | 11 (25.0)        | 8 (22.2)       |                      |
| Not very important                                                                                                                     | 4 (9.1)          | 8 (22.2)       |                      |
| Not at all important                                                                                                                   | 1 (2.3)          | 2 (5.6)        |                      |
| Do not know                                                                                                                            | 1 (2.3)          | 2 (5.6)        | 0.429                |
| 18f. Being able to complete an advance directive that would let loved ones know your wishes, if you were unable to speak for yourself. |                  |                |                      |
| Very important                                                                                                                         | 26 (59.1)        | 17 (47.2)      |                      |
| Somewhat important                                                                                                                     | 12 (27.3)        | 16 (44.4)      |                      |
| Neither important nor unimportant                                                                                                      | 3 (6.8)          | 1 (2.8)        |                      |
| Do not know                                                                                                                            | 3 (6.8)          | 2 (5.6)        |                      |
| 18g. Fulfilling personal goals/pleasures                                                                                               |                  |                | 0.354                |
| Very important                                                                                                                         | 27 (61.4)        | 28 (77.8)      |                      |
| Somewhat important                                                                                                                     | 15 (34.1)        | 7 (19.4)       |                      |
| Neither important nor unimportant                                                                                                      | 1 (2.3)          | 1 (2.8)        |                      |
| Not very important                                                                                                                     | 1 (2.3)          | 0 (0.0)        |                      |
| 18h. Reviewing your life history with your family                                                                                      |                  |                | 0.492                |
| Very important                                                                                                                         | 18 (40.9)        | 16 (44.4)      |                      |

| Somewhat important                                                                                        | 11 (25.0)        | 12 (33.3)      |                      |
|-----------------------------------------------------------------------------------------------------------|------------------|----------------|----------------------|
| <b>eTable 3. (continued) Frequencies of Adolescent Responses for Survey by Gender at Session 1 (N=80)</b> |                  |                |                      |
| Question                                                                                                  | Female<br>(N=44) | Male<br>(N=36) | P-value <sup>a</sup> |
|                                                                                                           | N (%)            | N (%)          |                      |
| Neither important nor unimportant                                                                         | 9 (20.5)         | 5 (13.9)       |                      |
| Not very important                                                                                        | 6 (13.6)         | 2 (5.6)        |                      |
| Do not know                                                                                               | 0 (0.0)          | 1 (2.8)        |                      |
| 18i. Having health care professionals visit you at your home                                              |                  |                | 0.718                |
| Very important                                                                                            | 15 (34.1)        | 9 (25.0)       |                      |
| Somewhat important                                                                                        | 19 (43.2)        | 15 (41.7)      |                      |
| Neither important nor unimportant                                                                         | 8 (18.2)         | 10 (27.8)      |                      |
| Not very important                                                                                        | 1 (2.3)          | 1 (2.8)        |                      |
| Not at all important                                                                                      | 0 (0.0)          | 1 (2.8)        |                      |
| Do not know                                                                                               | 1 (2.3)          | 0 (0.0)        |                      |
| 18j. Understanding your treatment choices                                                                 |                  |                | 0.393                |
| Very important                                                                                            | 41 (93.2)        | 32 (88.9)      |                      |
| Somewhat important                                                                                        | 3 (6.8)          | 2 (5.6)        |                      |
| Do not know                                                                                               | 0 (0.0)          | 2 (5.6)        |                      |
| 19. How important are each of the following is to you when you think about dying?                         |                  |                |                      |
| 19a. Being physically comfortable                                                                         |                  |                | 0.961                |
| Very important                                                                                            | 28 (63.6)        | 21 (58.3)      |                      |
| Somewhat important                                                                                        | 12 (27.3)        | 12 (33.3)      |                      |
| Neither important nor unimportant                                                                         | 2 (4.5)          | 2 (5.6)        |                      |
| Not very important                                                                                        | 1 (2.3)          | 0 (0.0)        |                      |
| Not at all important                                                                                      | 1 (2.3)          | 1 (2.8)        |                      |
| 19b. Being free from pain                                                                                 |                  |                | 0.691                |
| Very important                                                                                            | 28 (63.6)        | 23 (63.9)      |                      |
| Somewhat important                                                                                        | 12 (27.3)        | 6 (16.7)       |                      |
| Neither important nor unimportant                                                                         | 2 (4.5)          | 3 (8.3)        |                      |
| Not very important                                                                                        | 1 (2.3)          | 2 (5.6)        |                      |
| Not at all important                                                                                      | 1 (2.3)          | 1 (2.8)        |                      |
| Do not know                                                                                               | 0 (0.0)          | 1 (2.8)        |                      |
| 19c. Saying everything I want to say to people in my family                                               |                  |                | 0.505                |
| Very important                                                                                            | 33 (76.7)        | 30 (83.3)      |                      |
| Somewhat important                                                                                        | 9 (20.9)         | 5 (13.9)       |                      |
| Neither important nor unimportant                                                                         | 0 (0.0)          | 1 (2.8)        |                      |
| Not at all important                                                                                      | 1 (2.3)          | 0 (0.0)        |                      |
| 19d. Being at peace spiritually                                                                           |                  |                | 0.521                |
| Very important                                                                                            | 35 (79.5)        | 24 (66.7)      |                      |
| Somewhat important                                                                                        | 7 (15.9)         | 8 (22.2)       |                      |

|                                                                                                                                                                   |           |           |       |
|-------------------------------------------------------------------------------------------------------------------------------------------------------------------|-----------|-----------|-------|
| Neither important nor unimportant                                                                                                                                 | 1 (2.3)   | 1 (2.8)   |       |
| Not very important                                                                                                                                                | 0 (0.0)   | 2 (5.6)   |       |
| Do not know                                                                                                                                                       | 1 (2.3)   | 1 (2.8)   |       |
| 19e. Not being a burden to loved ones                                                                                                                             |           |           | 0.448 |
| Very important                                                                                                                                                    | 31 (70.5) | 23 (63.9) |       |
| Somewhat important                                                                                                                                                | 8 (18.2)  | 7 (19.4)  |       |
| Neither important nor unimportant                                                                                                                                 | 3 (6.8)   | 2 (5.6)   |       |
| Not very important                                                                                                                                                | 0 (0.0)   | 3 (8.3)   |       |
| Do not know                                                                                                                                                       | 2 (4.5)   | 1 (2.8)   |       |
| 19f. Knowing how to say good bye                                                                                                                                  |           |           | 0.020 |
| Very important                                                                                                                                                    | 37 (84.1) | 22 (61.1) |       |
| Somewhat important                                                                                                                                                | 4 (9.1)   | 8 (22.2)  |       |
| Neither important nor unimportant                                                                                                                                 | 3 (6.8)   | 1 (2.8)   |       |
| Not very important                                                                                                                                                | 0 (0.0)   | 2 (5.6)   |       |
| Do not know                                                                                                                                                       | 0 (0.0)   | 3 (8.3)   |       |
| 19g. Having a sense of my own worth or value                                                                                                                      |           |           | 0.005 |
| Very important                                                                                                                                                    | 32 (72.7) | 17 (47.2) |       |
| Somewhat important                                                                                                                                                | 6 (13.6)  | 17 (47.2) |       |
| Neither important nor unimportant                                                                                                                                 | 3 (6.8)   | 1 (2.8)   |       |
| Do not know                                                                                                                                                       | 3 (6.8)   | 1 (2.8)   |       |
| 19h. Being off machines that extend life, such as life support.                                                                                                   |           |           | 0.776 |
| Very important                                                                                                                                                    | 13 (29.5) | 10 (27.8) |       |
| Somewhat important                                                                                                                                                | 14 (31.8) | 11 (30.6) |       |
| Neither important nor unimportant                                                                                                                                 | 11 (25.0) | 10 (27.8) |       |
| Not very important                                                                                                                                                | 1 (2.3)   | 3 (8.3)   |       |
| Not at all important                                                                                                                                              | 2 (4.5)   | 0 (0.0)   |       |
| Do not know                                                                                                                                                       | 3 (6.8)   | 2 (5.6)   |       |
| 19i. Dying a natural death                                                                                                                                        |           |           | 0.095 |
| Very important                                                                                                                                                    | 15 (34.1) | 10 (27.8) |       |
| Somewhat important                                                                                                                                                | 7 (15.9)  | 16 (44.4) |       |
| Neither important nor unimportant                                                                                                                                 | 14 (31.8) | 6 (16.7)  |       |
| Not very important                                                                                                                                                | 4 (9.1)   | 2 (5.6)   |       |
| Not at all important                                                                                                                                              | 1 (2.3)   | 1 (2.8)   |       |
| Do not know                                                                                                                                                       | 3 (6.8)   | 1 (2.8)   |       |
| 20. If death were likely to happen in the next few weeks, and you could choose where to die, where would you MOST want to die?                                    |           |           | 0.426 |
| At home without hospice                                                                                                                                           | 9 (20.5)  | 14 (38.9) |       |
| At home in hospice                                                                                                                                                | 13 (29.5) | 7 (19.4)  |       |
| In a hospital                                                                                                                                                     | 6 (13.6)  | 4 (11.1)  |       |
| No preference                                                                                                                                                     | 8 (18.2)  | 4 (11.1)  |       |
| Do not know                                                                                                                                                       | 8 (18.2)  | 7 (19.4)  |       |
| 21. Below are some statements related to pain near the end-of-life that have been expressed by people. How strongly do you agree or disagree with each statement? |           |           |       |

| 21a. I am afraid the doctor may not believe I am in pain and treat my pain                                     |                  |                | 0.878                |
|----------------------------------------------------------------------------------------------------------------|------------------|----------------|----------------------|
| <b>eTable 3. (continued) Frequencies of Adolescent Responses for Survey by Gender at Session 1 (N=80)</b>      |                  |                |                      |
| Question                                                                                                       | Female<br>(N=44) | Male<br>(N=36) | P-value <sup>a</sup> |
|                                                                                                                | N (%)            | N (%)          |                      |
| Strongly agree                                                                                                 | 1 (2.3)          | 1 (2.8)        |                      |
| Agree                                                                                                          | 8 (18.2)         | 5 (13.9)       |                      |
| Neither agree or disagree                                                                                      | 5 (11.4)         | 5 (13.9)       |                      |
| Disagree                                                                                                       | 18 (40.9)        | 12 (33.3)      |                      |
| Strongly disagree                                                                                              | 10 (22.7)        | 9 (25.0)       |                      |
| Do not know                                                                                                    | 2 (4.5)          | 4 (11.1)       |                      |
| 21b. I would only take pain medicines when the pain is severe                                                  |                  |                | 0.533                |
| Strongly agree                                                                                                 | 14 (31.8)        | 11 (30.6)      |                      |
| Agree                                                                                                          | 16 (36.4)        | 12 (33.3)      |                      |
| Neither agree or disagree                                                                                      | 7 (15.9)         | 3 (8.3)        |                      |
| Disagree                                                                                                       | 6 (13.6)         | 9 (25.0)       |                      |
| Strongly disagree                                                                                              | 1 (2.3)          | 0 (0.0)        |                      |
| Do not know                                                                                                    | 0 (0.0)          | 1 (2.8)        |                      |
| 21c. I am afraid I will become addicted to the pain medicines over time                                        |                  |                | 0.708                |
| Strongly agree                                                                                                 | 2 (4.5)          | 1 (2.8)        |                      |
| Agree                                                                                                          | 10 (22.7)        | 7 (19.4)       |                      |
| Neither agree or disagree                                                                                      | 2 (4.5)          | 3 (8.3)        |                      |
| Disagree                                                                                                       | 12 (27.3)        | 12 (33.3)      |                      |
| Strongly disagree                                                                                              | 17 (38.6)        | 10 (27.8)      |                      |
| Do not know                                                                                                    | 1 (2.3)          | 3 (8.3)        |                      |
| 21d. I would take the lowest amount of medicine possible to save larger doses for later when the pain is worse |                  |                | 0.297                |
| Strongly agree                                                                                                 | 10 (22.7)        | 5 (13.9)       |                      |
| Agree                                                                                                          | 19 (43.2)        | 12 (33.3)      |                      |
| Neither agree or disagree                                                                                      | 7 (15.9)         | 5 (13.9)       |                      |
| Disagree                                                                                                       | 5 (11.4)         | 6 (16.7)       |                      |
| Strongly disagree                                                                                              | 3 (6.8)          | 5 (13.9)       |                      |
| Do not know                                                                                                    | 0 (0.0)          | 3 (8.3)        |                      |
| 21e. I am afraid I would be given too much pain medicine                                                       |                  |                | 0.305                |
| Strongly agree                                                                                                 | 2 (4.5)          | 4 (11.1)       |                      |
| Agree                                                                                                          | 7 (15.9)         | 7 (19.4)       |                      |
| Neither agree or disagree                                                                                      | 7 (15.9)         | 3 (8.3)        |                      |
| Disagree                                                                                                       | 18 (40.9)        | 11 (30.6)      |                      |
| Strongly disagree                                                                                              | 10 (22.7)        | 8 (22.2)       |                      |
| Do not know                                                                                                    | 0 (0.0)          | 3 (8.3)        |                      |
| 22. Have you heard of hospice services?                                                                        |                  |                | 0.695                |



| Yes                                                                                                           | 30 (68.2)        | 26 (72.2)      |                      |
|---------------------------------------------------------------------------------------------------------------|------------------|----------------|----------------------|
| No                                                                                                            | 14 (31.8)        | 10 (27.8)      |                      |
| <b>eTable 3. (continued) Frequencies of Adolescent Responses for Survey by Gender at Session 1 (N=80)</b>     |                  |                |                      |
| Question                                                                                                      | Female<br>(N=44) | Male<br>(N=36) | P-value <sup>a</sup> |
|                                                                                                               | N (%)            | N (%)          |                      |
| 23. How did you learn about hospice services? (N=56)                                                          |                  |                | 0.472                |
| I know someone who used hospice services                                                                      | 18 (60.0)        | 11 (42.3)      |                      |
| I heard from a health care professional                                                                       | 1 (3.3)          | 3 (11.5)       |                      |
| I read literature/newspaper/TV/radio/other media                                                              | 3 (10.0)         | 4 (15.4)       |                      |
| I heard from others                                                                                           | 8 (26.7)         | 8 (30.8)       |                      |
| 24. If you were dying, would you want hospice support? (N=56)                                                 |                  |                | 0.147                |
| Yes                                                                                                           | 13 (43.3)        | 11 (42.3)      |                      |
| No                                                                                                            | 1 (3.3)          | 5 (19.2)       |                      |
| Don't know/not sure                                                                                           | 16 (53.3)        | 10 (38.5)      |                      |
| 25. Do you consider yourself religious/spiritual?                                                             |                  |                | 0.203                |
| Very religious/spiritual                                                                                      | 13 (29.5)        | 8 (22.2)       |                      |
| Somewhat religious/spiritual                                                                                  | 20 (45.5)        | 19 (52.8)      |                      |
| Not very religious/spiritual                                                                                  | 7 (15.9)         | 2 (5.6)        |                      |
| Not religious/spiritual                                                                                       | 3 (6.8)          | 7 (19.4)       |                      |
| Declined                                                                                                      | 1 (2.3)          | 0 (0.0)        |                      |
| 26. How often do you attend religious or spiritual services? (N=69)                                           |                  |                | 0.874                |
| Always                                                                                                        | 4 (10.0)         | 2 (6.9)        |                      |
| Very often                                                                                                    | 9 (22.5)         | 7 (24.1)       |                      |
| Sometimes                                                                                                     | 18 (45.0)        | 14 (48.3)      |                      |
| Rarely                                                                                                        | 8 (20.0)         | 4 (13.8)       |                      |
| Never                                                                                                         | 1 (2.5)          | 2 (6.9)        |                      |
| 27. How often does religion or spirituality help you face your fears or do what you were afraid to do? (N=69) |                  |                | 0.358                |
| Everyday                                                                                                      | 9 (22.5)         | 9 (31.0)       |                      |
| A few times a week                                                                                            | 8 (20.0)         | 9 (31.0)       |                      |
| A few times a month                                                                                           | 12 (30.0)        | 6 (20.7)       |                      |
| Rarely                                                                                                        | 7 (17.5)         | 5 (17.2)       |                      |
| Never                                                                                                         | 4 (10.0)         | 0 (0.0)        |                      |
| 30. HOW MANY NIGHTS did you stay in a hospital?                                                               |                  |                | 0.706                |
| 0                                                                                                             | 38 (86.4)        | 33 (91.7)      |                      |
| 1-2                                                                                                           | 1 (2.3)          | 0 (0.0)        |                      |
| 3-5                                                                                                           | 3 (6.8)          | 1 (2.8)        |                      |
| 6-10                                                                                                          | 1 (2.3)          | 2 (5.6)        |                      |
| >20                                                                                                           | 1 (2.3)          | 0 (0.0)        |                      |
| 31. How healthy are you feeling right now?                                                                    |                  |                | 0.696                |
| Excellent health                                                                                              | 10 (22.7)        | 12 (33.3)      |                      |

| Very good health                                                                                                                                                                                                                                                                                                                                                     | 17 (38.6)        | 14 (38.9)      |                      |
|----------------------------------------------------------------------------------------------------------------------------------------------------------------------------------------------------------------------------------------------------------------------------------------------------------------------------------------------------------------------|------------------|----------------|----------------------|
| <b>eTable 3. (continued) Frequencies of Adolescent Responses for Survey by Gender at Session 1 (N=80)</b>                                                                                                                                                                                                                                                            |                  |                |                      |
| Question                                                                                                                                                                                                                                                                                                                                                             | Female<br>(N=44) | Male<br>(N=36) | P-value <sup>a</sup> |
|                                                                                                                                                                                                                                                                                                                                                                      | N (%)            | N (%)          |                      |
| Good health                                                                                                                                                                                                                                                                                                                                                          | 10 (22.7)        | 5 (13.9)       |                      |
| Fair health                                                                                                                                                                                                                                                                                                                                                          | 6 (13.6)         | 3 (8.3)        |                      |
| Poor health                                                                                                                                                                                                                                                                                                                                                          | 1 (2.3)          | 1 (2.8)        |                      |
| Declined                                                                                                                                                                                                                                                                                                                                                             | 0 (0.0)          | 1 (2.8)        |                      |
| 32a. Is your mother alive?                                                                                                                                                                                                                                                                                                                                           |                  |                | 1.000                |
| Yes                                                                                                                                                                                                                                                                                                                                                                  | 43 (97.7)        | 36 (100.0)     |                      |
| No                                                                                                                                                                                                                                                                                                                                                                   | 1 (2.3)          | 0 (0.0)        |                      |
| 32b. Is your father alive?                                                                                                                                                                                                                                                                                                                                           |                  |                | 0.685                |
| Yes                                                                                                                                                                                                                                                                                                                                                                  | 39 (88.6)        | 34 (94.4)      |                      |
| No                                                                                                                                                                                                                                                                                                                                                                   | 3 (6.8)          | 2 (5.6)        |                      |
| Do not know                                                                                                                                                                                                                                                                                                                                                          | 2 (4.5)          | 0 (0.0)        |                      |
| <sup>a</sup> : Pearson chi-square test or Fisher' exact test.<br><sup>b</sup> : Bonferroni corrected significant level is 0.05/8=0.006.<br><sup>c</sup> : Bonferroni corrected significant level is 0.05/4=0.013<br><sup>d</sup> : Bonferroni corrected significant level is 0.05/10=0.005.<br><sup>e</sup> : Bonferroni corrected significant level is 0.05/4=0.013 |                  |                |                      |

**eTable 4. Frequencies of Adolescent Responses for Survey by Race at Session 1 (N=79<sup>a</sup>)**

| Question                                                                                                                                                                               | White<br>(N=60) | Non-White<br>(N=19) | P-value <sup>b</sup> |
|----------------------------------------------------------------------------------------------------------------------------------------------------------------------------------------|-----------------|---------------------|----------------------|
|                                                                                                                                                                                        | N (%)           | N (%)               |                      |
| 1. Have you ever written down any thoughts about your future health plans?                                                                                                             |                 |                     | 0.280                |
| Yes, definitely                                                                                                                                                                        | 1 (1.7)         | 2 (10.5)            |                      |
| Very probably                                                                                                                                                                          | 1 (1.7)         | 0 (0.0)             |                      |
| Probably                                                                                                                                                                               | 5 (8.3)         | 0 (0.0)             |                      |
| Probably not                                                                                                                                                                           | 7 (11.7)        | 4 (21.1)            |                      |
| Definitely no                                                                                                                                                                          | 43 (71.7)       | 12 (63.2)           |                      |
| Do not know                                                                                                                                                                            | 3 (5.0)         | 1 (5.3)             |                      |
| 2a. Have you ever heard about and completed a Health Care Power of Attorney (HCPA), in which you name someone to make decisions about your health care in case you could not?          |                 |                     | 0.588                |
| Have heard about and completed                                                                                                                                                         | 1 (1.7)         | 0 (0.0)             |                      |
| Have heard about but not completed                                                                                                                                                     | 27 (45.0)       | 9 (47.4)            |                      |
| Have not heard about                                                                                                                                                                   | 28 (46.7)       | 7 (36.8)            |                      |
| Do not know                                                                                                                                                                            | 4 (6.7)         | 3 (15.8)            |                      |
| 2b. Have you ever heard about and completed an Advance Directive or living will, such as the Five Wishes?                                                                              |                 |                     | 0.650                |
| Have heard about and completed                                                                                                                                                         | 2 (3.3)         | 0 (0.0)             |                      |
| Have heard about but not completed                                                                                                                                                     | 24 (40.0)       | 5 (26.3)            |                      |
| Have not heard about                                                                                                                                                                   | 31 (51.7)       | 13 (68.4)           |                      |
| Do not know                                                                                                                                                                            | 3 (5.0)         | 1 (5.3)             |                      |
| 3a. Whether you have completed any advance directives/pre-plans or not, have you talked about your wishes for care at the end of life with anyone? Select all that apply. <sup>c</sup> |                 |                     |                      |
| Spouse/partner                                                                                                                                                                         | 0 (0.0)         | 0 (0.0)             | -                    |
| Parents                                                                                                                                                                                | 18 (30.0)       | 6 (31.6)            | 0.896                |
| Siblings (brother/sister)                                                                                                                                                              | 8 (13.3)        | 1 (5.3)             | 0.679                |
| Friends                                                                                                                                                                                | 8 (13.3)        | 0 (0.0)             | 0.188                |
| Boyfriend/girlfriend                                                                                                                                                                   | 3 (5.0)         | 1 (5.3)             | 1.000                |
| Lawyer                                                                                                                                                                                 | 0 (0.0)         | 0 (0.0)             | -                    |
| Primary physician                                                                                                                                                                      | 1 (1.7)         | 0 (0.0)             | 1.000                |
| Clergy (such as minister, rabbi, iman etc.)                                                                                                                                            | 1 (1.7)         | 0 (0.0)             | 1.000                |
| Other                                                                                                                                                                                  | 0 (0.0)         | 1 (5.3)             | 0.241                |
| Have not talked with anyone                                                                                                                                                            | 38 (63.3)       | 12 (63.2)           | 0.989                |
| 3b. Do you have any children?                                                                                                                                                          |                 |                     |                      |
| No                                                                                                                                                                                     | 60 (100.0)      | 19 (100.0)          | -                    |
| 4. If you were very ill and knew that you would not get better, who would you want to be involved in decisions about your end-of-life care? Select all that apply. <sup>d</sup>        |                 |                     |                      |
| Myself                                                                                                                                                                                 | 39 (65.0)       | 13 (68.4)           | 0.784                |

**eTable 4. (continued) Frequencies of Adolescent Responses for Survey by Race at Session 1 (N=79<sup>a</sup>)**

| Question                                                                                                                                                                                 | White<br>(N=60) | Non-White<br>(N=19) | P-value <sup>b</sup> |
|------------------------------------------------------------------------------------------------------------------------------------------------------------------------------------------|-----------------|---------------------|----------------------|
|                                                                                                                                                                                          | N (%)           | N (%)               |                      |
| My family                                                                                                                                                                                | 58 (96.7)       | 18 (94.7)           | 0.567                |
| My doctor                                                                                                                                                                                | 34 (56.7)       | 11 (57.9)           | 0.925                |
| Someone else                                                                                                                                                                             | 6 (10.0)        | 2 (10.5)            | 1.000                |
| 5. When do you think it is the best time to bring up end-of-life decisions?                                                                                                              |                 |                     | 0.059                |
| Before getting sick, while healthy                                                                                                                                                       | 27 (45.0)       | 4 (21.1)            |                      |
| When first diagnosed with a life-threatening illness                                                                                                                                     | 7 (11.7)        | 4 (21.1)            |                      |
| When first sick from a life-threatening illness                                                                                                                                          | 4 (6.7)         | 2 (10.5)            |                      |
| When first hospitalized with a life-threatening illness                                                                                                                                  | 0 (0.0)         | 1 (5.3)             |                      |
| If dying                                                                                                                                                                                 | 4 (6.7)         | 0 (0.0)             |                      |
| All of the above                                                                                                                                                                         | 1 (1.7)         | 2 (10.5)            |                      |
| Never                                                                                                                                                                                    | 15 (25.0)       | 5 (26.3)            |                      |
| Other                                                                                                                                                                                    | 0 (0.0)         | 1 (5.3)             |                      |
| Do not know                                                                                                                                                                              | 2 (3.3)         | 0 (0.0)             |                      |
| 6. Who are the best people/best person on the treatment team to bring it up with you? Select all that apply. <sup>e</sup>                                                                |                 |                     |                      |
| Physician                                                                                                                                                                                | 37 (61.7)       | 12 (63.2)           | 0.907                |
| Nurse practitioner                                                                                                                                                                       | 21 (35.0)       | 5 (26.3)            | 0.483                |
| Nurse                                                                                                                                                                                    | 19 (31.7)       | 5 (26.3)            | 0.659                |
| Social worker                                                                                                                                                                            | 18 (30.0)       | 4 (21.1)            | 0.564                |
| Psychologist                                                                                                                                                                             | 11 (18.3)       | 2 (10.5)            | 0.723                |
| Case manager                                                                                                                                                                             | 3 (5.0)         | 1 (5.3)             | 1.000                |
| Chaplain                                                                                                                                                                                 | 4 (6.7)         | 1 (5.3)             | 1.000                |
| Patient advocate                                                                                                                                                                         | 6 (10.0)        | 1 (5.3)             | 1.000                |
| Other                                                                                                                                                                                    | 3 (5.0)         | 1 (5.3)             | 1.000                |
| Do not know                                                                                                                                                                              | 9 (15.0)        | 2 (10.5)            | 1.000                |
| 7. Do you believe that once you make an important medical decision, for example, to be put on a respirator, a machine that breathes for you, that you would be able to change your mind? |                 |                     | 0.105                |
| Yes, definitely                                                                                                                                                                          | 11 (18.3)       | 8 (42.1)            |                      |
| Very probably                                                                                                                                                                            | 11 (18.3)       | 0 (0.0)             |                      |
| Probably                                                                                                                                                                                 | 21 (35.0)       | 5 (26.3)            |                      |
| Probably not                                                                                                                                                                             | 11 (18.3)       | 4 (21.1)            |                      |
| Do not know                                                                                                                                                                              | 6 (10.0)        | 2 (10.5)            |                      |
| 8. Do you think your doctor or the hospital will respect your wishes, that is, do what you want about medical care?                                                                      |                 |                     | 1.000                |
| Yes, definitely                                                                                                                                                                          | 30 (50.0)       | 10 (52.6)           |                      |
| Very probably                                                                                                                                                                            | 15 (25.0)       | 5 (26.3)            |                      |
| Probably                                                                                                                                                                                 | 9 (15.0)        | 3 (15.8)            |                      |

**eTable 4. (continued) Frequencies of Adolescent Responses for Survey by Race at Session 1 (N=79<sup>a</sup>)**

| Question                                                                                                                     | White<br>(N=60) | Non-White<br>(N=19) | P-value <sup>b</sup> |
|------------------------------------------------------------------------------------------------------------------------------|-----------------|---------------------|----------------------|
|                                                                                                                              | N (%)           | N (%)               |                      |
| Probably not                                                                                                                 | 3 (5.0)         | 1 (5.3)             |                      |
| Do not know                                                                                                                  | 3 (5.0)         | 0 (0.0)             |                      |
| 9. Do you think your parent/guardian/surrogate understands your wishes?                                                      |                 |                     | 0.891                |
| Yes, definitely                                                                                                              | 29 (48.3)       | 12 (66.7)           |                      |
| Very probably                                                                                                                | 11 (18.3)       | 2 (11.1)            |                      |
| Probably                                                                                                                     | 12 (20.0)       | 3 (16.7)            |                      |
| Probably not                                                                                                                 | 4 (6.7)         | 1 (5.6)             |                      |
| Definitely no                                                                                                                | 1 (1.7)         | 0 (0.0)             |                      |
| Do not know                                                                                                                  | 3 (5.0)         | 0 (0.0)             |                      |
| 10. Do you think your parent/guardian/surrogate will respect your wishes, that is, do what you want about your medical care? |                 |                     | 1.000                |
| Yes, definitely                                                                                                              | 31 (51.7)       | 10 (52.6)           |                      |
| Very probably                                                                                                                | 13 (21.7)       | 4 (21.1)            |                      |
| Probably                                                                                                                     | 11 (18.3)       | 3 (15.8)            |                      |
| Probably not                                                                                                                 | 3 (5.0)         | 1 (5.3)             |                      |
| Do not know                                                                                                                  | 2 (3.3)         | 1 (5.3)             |                      |
| 11. How often has death and dying been talked about in your family?                                                          |                 |                     | 0.363                |
| Very often                                                                                                                   | 2 (3.3)         | 0 (0.0)             |                      |
| Often                                                                                                                        | 6 (10.0)        | 6 (31.6)            |                      |
| Occasionally                                                                                                                 | 20 (33.3)       | 5 (26.3)            |                      |
| Rarely                                                                                                                       | 25 (41.7)       | 7 (36.8)            |                      |
| Never                                                                                                                        | 4 (6.7)         | 1 (5.3)             |                      |
| Do not know                                                                                                                  | 3 (5.0)         | 0 (0.0)             |                      |
| 12. How comfortable are you talking about death?                                                                             |                 |                     | 0.797                |
| Very comfortable                                                                                                             | 13 (21.7)       | 3 (15.8)            |                      |
| Somewhat comfortable                                                                                                         | 25 (41.7)       | 8 (42.1)            |                      |
| Neither comfortable or uncomfortable                                                                                         | 12 (20.0)       | 4 (21.1)            |                      |
| Not very comfortable                                                                                                         | 6 (10.0)        | 1 (5.3)             |                      |
| Not at all comfortable                                                                                                       | 3 (5.0)         | 2 (10.5)            |                      |
| Do not know                                                                                                                  | 1 (1.7)         | 1 (5.3)             |                      |
| 13. How likely are you to?                                                                                                   |                 |                     |                      |
| 13a. Attend funerals or memorial services when a loved one, friend or classmate dies                                         |                 |                     | 0.056                |
| Very likely                                                                                                                  | 47 (78.3)       | 13 (68.4)           |                      |
| Somewhat likely                                                                                                              | 10 (16.7)       | 2 (10.5)            |                      |
| Neither likely or unlikely                                                                                                   | 0 (0.0)         | 2 (10.5)            |                      |
| Not very likely                                                                                                              | 0 (0.0)         | 1 (5.3)             |                      |

**eTable 4. (continued) Frequencies of Adolescent Responses for Survey by Race at Session 1 (N=79<sup>a</sup>)**

| Question                                                                                                          | White<br>(N=60) | Non-White<br>(N=19) | P-value <sup>b</sup> |
|-------------------------------------------------------------------------------------------------------------------|-----------------|---------------------|----------------------|
|                                                                                                                   | N (%)           | N (%)               |                      |
| Not at all likely                                                                                                 | 1 (1.7)         | 1 (5.3)             |                      |
| Do not know                                                                                                       | 2 (3.3)         | 0 (0.0)             |                      |
| 13b. Avoid medical checkups because you are afraid the doctor will find "something serious"                       |                 |                     | 0.710                |
| Very likely                                                                                                       | 2 (3.3)         | 0 (0.0)             |                      |
| Somewhat likely                                                                                                   | 9 (15.0)        | 1 (5.3)             |                      |
| Neither likely or unlikely                                                                                        | 3 (5.0)         | 0 (0.0)             |                      |
| Not very likely                                                                                                   | 8 (13.3)        | 4 (21.1)            |                      |
| Not at all likely                                                                                                 | 37 (61.7)       | 14 (73.7)           |                      |
| Do not know                                                                                                       | 1 (1.7)         | 0 (0.0)             |                      |
| 13c. Speak freely to loved ones about death and dying                                                             |                 |                     | 0.677                |
| Very likely                                                                                                       | 11 (18.3)       | 6 (31.6)            |                      |
| Somewhat likely                                                                                                   | 23 (38.3)       | 5 (26.3)            |                      |
| Neither likely or unlikely                                                                                        | 13 (21.7)       | 4 (21.1)            |                      |
| Not very likely                                                                                                   | 7 (11.7)        | 1 (5.3)             |                      |
| Not at all likely                                                                                                 | 5 (8.3)         | 3 (15.8)            |                      |
| Do not know                                                                                                       | 1 (1.7)         | 0 (0.0)             |                      |
| 13d. Visit or telephone a friend or relative who has recently lost a loved one in order to see how they are doing |                 |                     | 1.000                |
| Very likely                                                                                                       | 44 (73.3)       | 14 (73.7)           |                      |
| Somewhat likely                                                                                                   | 12 (20.0)       | 4 (21.1)            |                      |
| Neither likely or unlikely                                                                                        | 2 (3.3)         | 1 (5.3)             |                      |
| Not very likely                                                                                                   | 2 (3.3)         | 0 (0.0)             |                      |
| 13e. Preplan your own funeral, for example, choose someone to speak or choose the music you would want            |                 |                     | 0.258                |
| Very likely                                                                                                       | 22 (36.7)       | 4 (21.1)            |                      |
| Somewhat likely                                                                                                   | 10 (16.7)       | 4 (21.1)            |                      |
| Neither likely or unlikely                                                                                        | 9 (15.0)        | 4 (21.1)            |                      |
| Not very likely                                                                                                   | 5 (8.3)         | 5 (26.3)            |                      |
| Not at all likely                                                                                                 | 10 (16.7)       | 1 (5.3)             |                      |
| Do not know                                                                                                       | 4 (6.7)         | 1 (5.3)             |                      |
| 14. How afraid, if at all, are you of?                                                                            |                 |                     |                      |
| 14a. Dying from a long term illness                                                                               |                 |                     | 0.166                |
| Very afraid                                                                                                       | 5 (8.3)         | 4 (21.1)            |                      |
| Somewhat afraid                                                                                                   | 22 (36.7)       | 3 (15.8)            |                      |
| Neither afraid nor not afraid                                                                                     | 7 (11.7)        | 2 (10.5)            |                      |
| Not very afraid                                                                                                   | 10 (16.7)       | 7 (36.8)            |                      |
| Not at all afraid                                                                                                 | 13 (21.7)       | 3 (15.8)            |                      |
| Do not know                                                                                                       | 3 (5.0)         | 0 (0.0)             |                      |

**eTable 4. (continued) Frequencies of Adolescent Responses for Survey by Race at Session 1 (N=79<sup>a</sup>)**

| Question                                                              | White<br>(N=60) | Non-White<br>(N=19) | P-value <sup>b</sup> |
|-----------------------------------------------------------------------|-----------------|---------------------|----------------------|
|                                                                       | N (%)           | N (%)               |                      |
| 14b. Dying suddenly, such as an accident, or being killed:            |                 |                     | 0.832                |
| Very afraid                                                           | 10 (16.7)       | 4 (21.1)            |                      |
| Somewhat afraid                                                       | 21 (35.0)       | 4 (21.1)            |                      |
| Neither afraid nor not afraid                                         | 9 (15.0)        | 4 (21.1)            |                      |
| Not very afraid                                                       | 10 (16.7)       | 4 (21.1)            |                      |
| Not at all afraid                                                     | 9 (15.0)        | 3 (15.8)            |                      |
| Do not know                                                           | 1 (1.7)         | 0 (0.0)             |                      |
| 14c. Dying alone                                                      |                 |                     | 0.888                |
| Very afraid                                                           | 18 (30.0)       | 6 (31.6)            |                      |
| Somewhat afraid                                                       | 10 (16.7)       | 4 (21.1)            |                      |
| Neither afraid nor not afraid                                         | 10 (16.7)       | 3 (15.8)            |                      |
| Not very afraid                                                       | 9 (15.0)        | 1 (5.3)             |                      |
| Not at all afraid                                                     | 12 (20.0)       | 5 (26.3)            |                      |
| Do not know                                                           | 1 (1.7)         | 0 (0.0)             |                      |
| 14d. Dying in an institution such as a nursing home or hospital       |                 |                     | 0.036                |
| Very afraid                                                           | 7 (11.7)        | 6 (31.6)            |                      |
| Somewhat afraid                                                       | 10 (16.7)       | 2 (10.5)            |                      |
| Neither afraid nor not afraid                                         | 14 (23.3)       | 1 (5.3)             |                      |
| Not very afraid                                                       | 14 (23.3)       | 1 (5.3)             |                      |
| Not at all afraid                                                     | 13 (21.7)       | 8 (42.1)            |                      |
| Do not know                                                           | 2 (3.3)         | 1 (5.3)             |                      |
| 14e. Dying painfully                                                  |                 |                     | 0.069                |
| Very afraid                                                           | 17 (28.3)       | 10 (52.6)           |                      |
| Somewhat afraid                                                       | 24 (40.0)       | 2 (10.5)            |                      |
| Neither afraid nor not afraid                                         | 6 (10.0)        | 1 (5.3)             |                      |
| Not very afraid                                                       | 7 (11.7)        | 2 (10.5)            |                      |
| Not at all afraid                                                     | 5 (8.3)         | 4 (21.1)            |                      |
| Do not know                                                           | 1 (1.7)         | 0 (0.0)             |                      |
| 15. How strongly do you agree or disagree that?                       |                 |                     |                      |
| 15a. Dying is an important part of life                               |                 |                     | 0.776                |
| Strongly agree                                                        | 24 (40.0)       | 9 (47.4)            |                      |
| Agree                                                                 | 24 (40.0)       | 5 (26.3)            |                      |
| Neither agree or disagree                                             | 6 (10.0)        | 3 (15.8)            |                      |
| Disagree                                                              | 4 (6.7)         | 2 (10.5)            |                      |
| Strongly disagree                                                     | 1 (1.7)         | 0 (0.0)             |                      |
| Do not know                                                           | 1 (1.7)         | 0 (0.0)             |                      |
| 15b. If someone could tell me when I would die, I would want to know. |                 |                     | 0.222                |

**eTable 4. (continued) Frequencies of Adolescent Responses for Survey by Race at Session 1 (N=79<sup>a</sup>)**

| Question                                                                                                                   | White<br>(N=60) | Non-White<br>(N=19) | P-value <sup>b</sup> |
|----------------------------------------------------------------------------------------------------------------------------|-----------------|---------------------|----------------------|
|                                                                                                                            | N (%)           | N (%)               |                      |
| Strongly agree                                                                                                             | 9 (15.0)        | 7 (36.8)            |                      |
| Agree                                                                                                                      | 12 (20.0)       | 1 (5.3)             |                      |
| Neither agree or disagree                                                                                                  | 8 (13.3)        | 2 (10.5)            |                      |
| Disagree                                                                                                                   | 7 (11.7)        | 4 (21.1)            |                      |
| Strongly disagree                                                                                                          | 20 (33.3)       | 4 (21.1)            |                      |
| Do not know                                                                                                                | 4 (6.7)         | 1 (5.3)             |                      |
| 16. When you think about death and dying, how concerned are you that?                                                      |                 |                     |                      |
| 16a. The family's money won't last:                                                                                        |                 |                     | 0.614                |
| Very concerned                                                                                                             | 2 (3.3)         | 1 (5.3)             |                      |
| Concerned                                                                                                                  | 17 (28.3)       | 3 (15.8)            |                      |
| Neither concerned nor unconcerned                                                                                          | 14 (23.3)       | 7 (36.8)            |                      |
| Not concerned                                                                                                              | 8 (13.3)        | 4 (21.1)            |                      |
| Not at all concerned                                                                                                       | 15 (25.0)       | 3 (15.8)            |                      |
| Do not know                                                                                                                | 4 (6.7)         | 1 (5.3)             |                      |
| 16b. I will be a burden to, or overload, my family or friends.                                                             |                 |                     | 0.760                |
| Very concerned                                                                                                             | 8 (13.3)        | 5 (26.3)            |                      |
| Concerned                                                                                                                  | 21 (35.0)       | 5 (26.3)            |                      |
| Neither concerned nor unconcerned                                                                                          | 6 (10.0)        | 1 (5.3)             |                      |
| Not concerned                                                                                                              | 14 (23.3)       | 5 (26.3)            |                      |
| Not at all concerned                                                                                                       | 8 (13.3)        | 3 (15.8)            |                      |
| Do not know                                                                                                                | 3 (5.0)         | 0 (0.0)             |                      |
| 17. Which of the following health problems, if any, do you think are worse than death? Select all that apply. <sup>f</sup> |                 |                     |                      |
| Living with great pain                                                                                                     | 22 (36.7)       | 11 (57.9)           | 0.102                |
| Total physical dependency on others, for example, being in a wheelchair                                                    | 15 (25.0)       | 7 (36.8)            | 0.316                |
| Not being able to communicate my wishes and/or care to family members, for example, being in a coma Checked                | 36 (60.0)       | 12 (63.2)           | 0.806                |
| None are worse than death                                                                                                  | 17 (28.3)       | 4 (21.1)            | 0.767                |
| 18. How important would each of the following be to you if you were dealing with your own dying?                           |                 |                     |                      |
| 18a. Family/friends visiting you                                                                                           |                 |                     | 0.097                |
| Very important                                                                                                             | 53 (88.3)       | 15 (78.9)           |                      |
| Somewhat important                                                                                                         | 6 (10.0)        | 2 (10.5)            |                      |
| Neither important nor unimportant                                                                                          | 0 (0.0)         | 2 (10.5)            |                      |
| Do not know                                                                                                                | 1 (1.7)         | 0 (0.0)             |                      |
| 18b. Being able to stay in your own home                                                                                   |                 |                     | 0.942                |
| Very important                                                                                                             | 19 (31.7)       | 8 (42.1)            |                      |



**eTable 4. (continued) Frequencies of Adolescent Responses for Survey by Race at Session 1 (N=79<sup>a</sup>)**

| Question                                                                                                                               | White<br>(N=60) | Non-White<br>(N=19) | P-value <sup>b</sup> |
|----------------------------------------------------------------------------------------------------------------------------------------|-----------------|---------------------|----------------------|
|                                                                                                                                        | N (%)           | N (%)               |                      |
| Somewhat important                                                                                                                     | 27 (45.0)       | 7 (36.8)            |                      |
| Neither important nor unimportant                                                                                                      | 5 (8.3)         | 2 (10.5)            |                      |
| Not very important                                                                                                                     | 6 (10.0)        | 2 (10.5)            |                      |
| Not at all important                                                                                                                   | 2 (3.3)         | 0 (0.0)             |                      |
| Do not know                                                                                                                            | 1 (1.7)         | 0 (0.0)             |                      |
| 18c. Honest answers from your doctor                                                                                                   |                 |                     | 0.567                |
| Very important                                                                                                                         | 58 (96.7)       | 18 (94.7)           |                      |
| Somewhat important                                                                                                                     | 2 (3.3)         | 1 (5.3)             |                      |
| 18d. Comfort from church services or persons such as a minister, priest, imam, or rabbi                                                |                 |                     | 0.957                |
| Very important                                                                                                                         | 21 (35.0)       | 9 (47.4)            |                      |
| Somewhat important                                                                                                                     | 16 (26.7)       | 5 (26.3)            |                      |
| Neither important nor unimportant                                                                                                      | 7 (11.7)        | 2 (10.5)            |                      |
| Not very important                                                                                                                     | 5 (8.3)         | 1 (5.3)             |                      |
| Not at all important                                                                                                                   | 10 (16.7)       | 2 (10.5)            |                      |
| Do not know                                                                                                                            | 1 (1.7)         | 0 (0.0)             |                      |
| 18e. Planning your own funeral                                                                                                         |                 |                     | 0.277                |
| Very important                                                                                                                         | 11 (18.3)       | 5 (26.3)            |                      |
| Somewhat important                                                                                                                     | 22 (36.7)       | 4 (21.1)            |                      |
| Neither important nor unimportant                                                                                                      | 11 (18.3)       | 8 (42.1)            |                      |
| Not very important                                                                                                                     | 10 (16.7)       | 2 (10.5)            |                      |
| Not at all important                                                                                                                   | 3 (5.0)         | 0 (0.0)             |                      |
| Do not know                                                                                                                            | 3 (5.0)         | 0 (0.0)             |                      |
| 18f. Being able to complete an advance directive that would let loved ones know your wishes, if you were unable to speak for yourself. |                 |                     | 0.259                |
| Very important                                                                                                                         | 33 (55.0)       | 9 (47.4)            |                      |
| Somewhat important                                                                                                                     | 22 (36.7)       | 6 (31.6)            |                      |
| Neither important nor unimportant                                                                                                      | 3 (5.0)         | 1 (5.3)             |                      |
| Do not know                                                                                                                            | 2 (3.3)         | 3 (15.8)            |                      |
| 18g. Fulfilling personal goals/pleasures                                                                                               |                 |                     | 1.000                |
| Very important                                                                                                                         | 40 (66.7)       | 14 (73.7)           |                      |
| Somewhat important                                                                                                                     | 17 (28.3)       | 5 (26.3)            |                      |
| Neither important nor unimportant                                                                                                      | 2 (3.3)         | 0 (0.0)             |                      |
| Not very important                                                                                                                     | 1 (1.7)         | 0 (0.0)             |                      |
| 18h. Reviewing your life history with your family                                                                                      |                 |                     | 0.170                |
| Very important                                                                                                                         | 22 (36.7)       | 11 (57.9)           |                      |
| Somewhat important                                                                                                                     | 20 (33.3)       | 3 (15.8)            |                      |
| Neither important nor unimportant                                                                                                      | 11 (18.3)       | 3 (15.8)            |                      |

**eTable 4. (continued) Frequencies of Adolescent Responses for Survey by Race at Session 1 (N=79<sup>a</sup>)**

| Question                                                                          | White<br>(N=60) | Non-White<br>(N=19) | P-value <sup>b</sup> |
|-----------------------------------------------------------------------------------|-----------------|---------------------|----------------------|
|                                                                                   | N (%)           | N (%)               |                      |
| Not very important                                                                | 7 (11.7)        | 1 (5.3)             |                      |
| Do not know                                                                       | 0 (0.0)         | 1 (5.3)             |                      |
| 18i. Having health care professionals visit you at your home                      |                 |                     | 1.000                |
| Very important                                                                    | 18 (30.0)       | 6 (31.6)            |                      |
| Somewhat important                                                                | 25 (41.7)       | 8 (42.1)            |                      |
| Neither important nor unimportant                                                 | 13 (21.7)       | 5 (26.3)            |                      |
| Not very important                                                                | 2 (3.3)         | 0 (0.0)             |                      |
| Not at all important                                                              | 1 (1.7)         | 0 (0.0)             |                      |
| Do not know                                                                       | 1 (1.7)         | 0 (0.0)             |                      |
| 18j. Understanding your treatment choices                                         |                 |                     | 0.092                |
| Very important                                                                    | 57 (95.0)       | 15 (78.9)           |                      |
| Somewhat important                                                                | 2 (3.3)         | 3 (15.8)            |                      |
| Do not know                                                                       | 1 (1.7)         | 1 (5.3)             |                      |
| 19. How important are each of the following is to you when you think about dying? |                 |                     |                      |
| 19a. Being physically comfortable                                                 |                 |                     | 0.559                |
| Very important                                                                    | 36 (60.0)       | 13 (68.4)           |                      |
| Somewhat important                                                                | 20 (33.3)       | 4 (21.1)            |                      |
| Neither important nor unimportant                                                 | 2 (3.3)         | 1 (5.3)             |                      |
| Not very important                                                                | 1 (1.7)         | 0 (0.0)             |                      |
| Not at all important                                                              | 1 (1.7)         | 1 (5.3)             |                      |
| 19b. Being free from pain                                                         |                 |                     | 0.419                |
| Very important                                                                    | 39 (65.0)       | 12 (63.2)           |                      |
| Somewhat important                                                                | 14 (23.3)       | 4 (21.1)            |                      |
| Neither important nor unimportant                                                 | 3 (5.0)         | 1 (5.3)             |                      |
| Not very important                                                                | 3 (5.0)         | 0 (0.0)             |                      |
| Not at all important                                                              | 1 (1.7)         | 1 (5.3)             |                      |
| Do not know                                                                       | 0 (0.0)         | 1 (5.3)             |                      |
| 19c. Saying everything I want to say to people in my family                       |                 |                     | 0.058                |
| Very important                                                                    | 44 (73.3)       | 18 (100.0)          |                      |
| Somewhat important                                                                | 14 (23.3)       | 0 (0.0)             |                      |
| Neither important nor unimportant                                                 | 1 (1.7)         | 0 (0.0)             |                      |
| Not at all important                                                              | 1 (1.7)         | 0 (0.0)             |                      |
| 19d. Being at peace spiritually                                                   |                 |                     | 0.784                |
| Very important                                                                    | 43 (71.7)       | 15 (78.9)           |                      |
| Somewhat important                                                                | 12 (20.0)       | 3 (15.8)            |                      |
| Neither important nor unimportant                                                 | 1 (1.7)         | 1 (5.3)             |                      |
| Not very important                                                                | 2 (3.3)         | 0 (0.0)             |                      |

**eTable 4. (continued) Frequencies of Adolescent Responses for Survey by Race at Session 1 (N=79<sup>a</sup>)**

| Question                                                                                                                       | White<br>(N=60) | Non-White<br>(N=19) | P-value <sup>b</sup> |
|--------------------------------------------------------------------------------------------------------------------------------|-----------------|---------------------|----------------------|
|                                                                                                                                | N (%)           | N (%)               |                      |
| Do not know                                                                                                                    | 2 (3.3)         | 0 (0.0)             |                      |
| 19e. Not being a burden to loved ones                                                                                          |                 |                     | 0.467                |
| Very important                                                                                                                 | 38 (63.3)       | 16 (84.2)           |                      |
| Somewhat important                                                                                                             | 12 (20.0)       | 2 (10.5)            |                      |
| Neither important nor unimportant                                                                                              | 5 (8.3)         | 0 (0.0)             |                      |
| Not very important                                                                                                             | 2 (3.3)         | 1 (5.3)             |                      |
| Do not know                                                                                                                    | 3 (5.0)         | 0 (0.0)             |                      |
| 19f. Knowing how to say good bye                                                                                               |                 |                     | 0.438                |
| Very important                                                                                                                 | 45 (75.0)       | 13 (68.4)           |                      |
| Somewhat important                                                                                                             | 9 (15.0)        | 3 (15.8)            |                      |
| Neither important nor unimportant                                                                                              | 3 (5.0)         | 1 (5.3)             |                      |
| Not very important                                                                                                             | 2 (3.3)         | 0 (0.0)             |                      |
| Do not know                                                                                                                    | 1 (1.7)         | 2 (10.5)            |                      |
| 19g. Having a sense of my own worth or value                                                                                   |                 |                     | 0.417                |
| Very important                                                                                                                 | 35 (58.3)       | 14 (73.7)           |                      |
| Somewhat important                                                                                                             | 20 (33.3)       | 3 (15.8)            |                      |
| Neither important nor unimportant                                                                                              | 2 (3.3)         | 1 (5.3)             |                      |
| Do not know                                                                                                                    | 3 (5.0)         | 1 (5.3)             |                      |
| 19h. Being off machines that extend life, such as life support.                                                                |                 |                     | 0.649                |
| Very important                                                                                                                 | 17 (28.3)       | 6 (31.6)            |                      |
| Somewhat important                                                                                                             | 20 (33.3)       | 5 (26.3)            |                      |
| Neither important nor unimportant                                                                                              | 16 (26.7)       | 4 (21.1)            |                      |
| Not very important                                                                                                             | 2 (3.3)         | 2 (10.5)            |                      |
| Not at all important                                                                                                           | 1 (1.7)         | 1 (5.3)             |                      |
| Do not know                                                                                                                    | 4 (6.7)         | 1 (5.3)             |                      |
| 19i. Dying a natural death                                                                                                     |                 |                     | 0.295                |
| Very important                                                                                                                 | 18 (30.0)       | 7 (36.8)            |                      |
| Somewhat important                                                                                                             | 15 (25.0)       | 8 (42.1)            |                      |
| Neither important nor unimportant                                                                                              | 16 (26.7)       | 3 (15.8)            |                      |
| Not very important                                                                                                             | 6 (10.0)        | 0 (0.0)             |                      |
| Not at all important                                                                                                           | 1 (1.7)         | 1 (5.3)             |                      |
| Do not know                                                                                                                    | 4 (6.7)         | 0 (0.0)             |                      |
| 20. If death were likely to happen in the next few weeks, and you could choose where to die, where would you MOST want to die? |                 |                     | 0.484                |
| At home without hospice                                                                                                        | 16 (26.7)       | 7 (36.8)            |                      |
| At home in hospice                                                                                                             | 16 (26.7)       | 3 (15.8)            |                      |
| In a hospital                                                                                                                  | 6 (10.0)        | 4 (21.1)            |                      |
| No preference                                                                                                                  | 9 (15.0)        | 3 (15.8)            |                      |

**eTable 4. (continued) Frequencies of Adolescent Responses for Survey by Race at Session 1 (N=79<sup>a</sup>)**

| Question                                                                                                                                                          | White<br>(N=60) | Non-White<br>(N=19) | P-value <sup>b</sup> |
|-------------------------------------------------------------------------------------------------------------------------------------------------------------------|-----------------|---------------------|----------------------|
|                                                                                                                                                                   | N (%)           | N (%)               |                      |
| Do not know                                                                                                                                                       | 13 (21.7)       | 2 (10.5)            |                      |
| 21. Below are some statements related to pain near the end-of-life that have been expressed by people. How strongly do you agree or disagree with each statement? |                 |                     |                      |
| 21a. I am afraid the doctor may not believe I am in pain and treat my pain                                                                                        |                 |                     | 0.451                |
| Strongly agree                                                                                                                                                    | 2 (3.3)         | 0 (0.0)             |                      |
| Agree                                                                                                                                                             | 8 (13.3)        | 5 (26.3)            |                      |
| Neither agree or disagree                                                                                                                                         | 9 (15.0)        | 1 (5.3)             |                      |
| Disagree                                                                                                                                                          | 24 (40.0)       | 5 (26.3)            |                      |
| Strongly disagree                                                                                                                                                 | 13 (21.7)       | 6 (31.6)            |                      |
| Do not know                                                                                                                                                       | 4 (6.7)         | 2 (10.5)            |                      |
| 21b. I would only take pain medicines when the pain is severe                                                                                                     |                 |                     | 0.788                |
| Strongly agree                                                                                                                                                    | 17 (28.3)       | 8 (42.1)            |                      |
| Agree                                                                                                                                                             | 23 (38.3)       | 5 (26.3)            |                      |
| Neither agree or disagree                                                                                                                                         | 7 (11.7)        | 3 (15.8)            |                      |
| Disagree                                                                                                                                                          | 11 (18.3)       | 3 (15.8)            |                      |
| Strongly disagree                                                                                                                                                 | 1 (1.7)         | 0 (0.0)             |                      |
| Do not know                                                                                                                                                       | 1 (1.7)         | 0 (0.0)             |                      |
| 21c. I am afraid I will become addicted to the pain medicines over time                                                                                           |                 |                     | 0.437                |
| Strongly agree                                                                                                                                                    | 2 (3.3)         | 1 (5.3)             |                      |
| Agree                                                                                                                                                             | 11 (18.3)       | 6 (31.6)            |                      |
| Neither agree or disagree                                                                                                                                         | 5 (8.3)         | 0 (0.0)             |                      |
| Disagree                                                                                                                                                          | 19 (31.7)       | 4 (21.1)            |                      |
| Strongly disagree                                                                                                                                                 | 19 (31.7)       | 8 (42.1)            |                      |
| Do not know                                                                                                                                                       | 4 (6.7)         | 0 (0.0)             |                      |
| 21d. I would take the lowest amount of medicine possible to save larger doses for later when the pain is worse                                                    |                 |                     | 0.647                |
| Strongly agree                                                                                                                                                    | 11 (18.3)       | 4 (21.1)            |                      |
| Agree                                                                                                                                                             | 23 (38.3)       | 8 (42.1)            |                      |
| Neither agree or disagree                                                                                                                                         | 11 (18.3)       | 1 (5.3)             |                      |
| Disagree                                                                                                                                                          | 7 (11.7)        | 3 (15.8)            |                      |
| Strongly disagree                                                                                                                                                 | 5 (8.3)         | 3 (15.8)            |                      |
| Do not know                                                                                                                                                       | 3 (5.0)         | 0 (0.0)             |                      |
| 21e. I am afraid I would be given too much pain medicine                                                                                                          |                 |                     | 0.711                |
| Strongly agree                                                                                                                                                    | 4 (6.7)         | 2 (10.5)            |                      |
| Agree                                                                                                                                                             | 9 (15.0)        | 5 (26.3)            |                      |
| Neither agree or disagree                                                                                                                                         | 7 (11.7)        | 3 (15.8)            |                      |

**eTable 4. (continued) Frequencies of Adolescent Responses for Survey by Race at Session 1 (N=79<sup>a</sup>)**

| Question                                                                                                      | White<br>(N=60) | Non-White<br>(N=19) | P-value <sup>b</sup> |
|---------------------------------------------------------------------------------------------------------------|-----------------|---------------------|----------------------|
|                                                                                                               | N (%)           | N (%)               |                      |
| Disagree                                                                                                      | 23 (38.3)       | 5 (26.3)            |                      |
| Strongly disagree                                                                                             | 14 (23.3)       | 4 (21.1)            |                      |
| Do not know                                                                                                   | 3 (5.0)         | 0 (0.0)             |                      |
| 22. Have you heard of hospice services?                                                                       |                 |                     | 0.016                |
| Yes                                                                                                           | 46 (76.7)       | 9 (47.4)            |                      |
| No                                                                                                            | 14 (23.3)       | 10 (52.6)           |                      |
| 23. How did you learn about hospice services? (N=56)                                                          |                 |                     | 0.139                |
| I know someone who used hospice services                                                                      | 25 (54.3)       | 3 (33.3)            |                      |
| I heard from a health care professional                                                                       | 2 (4.3)         | 2 (22.2)            |                      |
| I read literature/newspaper/TV/radio/other media                                                              | 5 (10.9)        | 2 (22.2)            |                      |
| I heard from others                                                                                           | 14 (30.4)       | 2 (22.2)            |                      |
| 24. If you were dying, would you want hospice support? (N=56)                                                 |                 |                     | 0.113                |
| Yes                                                                                                           | 20 (43.5)       | 3 (33.3)            |                      |
| No                                                                                                            | 3 (6.5)         | 3 (33.3)            |                      |
| Don't know/not sure                                                                                           | 23 (50.0)       | 3 (33.3)            |                      |
| 25. Do you consider yourself religious/spiritual?                                                             |                 |                     | 0.198                |
| Very religious/spiritual                                                                                      | 14 (23.3)       | 7 (36.8)            |                      |
| Somewhat religious/spiritual                                                                                  | 31 (51.7)       | 7 (36.8)            |                      |
| Not very religious/spiritual                                                                                  | 6 (10.0)        | 3 (15.8)            |                      |
| Not religious/spiritual                                                                                       | 9 (15.0)        | 1 (5.3)             |                      |
| Declined                                                                                                      | 0 (0.0)         | 1 (5.3)             |                      |
| 26. How often do you attend religious or spiritual services? (N=69)                                           |                 |                     | 0.802                |
| Always                                                                                                        | 3 (5.9)         | 2 (11.8)            |                      |
| Very often                                                                                                    | 13 (25.5)       | 3 (17.6)            |                      |
| Sometimes                                                                                                     | 23 (45.1)       | 9 (52.9)            |                      |
| Rarely                                                                                                        | 9 (17.6)        | 3 (17.6)            |                      |
| Never                                                                                                         | 3 (5.9)         | 0 (0.0)             |                      |
| 27. How often does religion or spirituality help you face your fears or do what you were afraid to do? (N=69) |                 |                     | 0.118                |
| Everyday                                                                                                      | 10 (19.6)       | 8 (47.1)            |                      |
| A few times a week                                                                                            | 15 (29.4)       | 2 (11.8)            |                      |
| A few times a month                                                                                           | 14 (27.5)       | 3 (17.6)            |                      |
| Rarely                                                                                                        | 10 (19.6)       | 2 (11.8)            |                      |
| Never                                                                                                         | 2 (3.9)         | 2 (11.8)            |                      |
| 30. HOW MANY NIGHTS did you stay in a hospital?                                                               |                 |                     | 0.097                |
| 0                                                                                                             | 56 (93.3)       | 15 (78.9)           |                      |
| 1-2                                                                                                           | 0 (0.0)         | 1 (5.3)             |                      |

**eTable 4. (continued) Frequencies of Adolescent Responses for Survey by Race at Session 1 (N=79<sup>a</sup>)**

| Question                                   | White<br>(N=60) | Non-White<br>(N=19) | P-value <sup>b</sup> |
|--------------------------------------------|-----------------|---------------------|----------------------|
|                                            | N (%)           | N (%)               |                      |
| 3-5                                        | 2 (3.3)         | 1 (5.3)             |                      |
| 6-10                                       | 2 (3.3)         | 1 (5.3)             |                      |
| >20                                        | 0 (0.0)         | 1 (5.3)             |                      |
| 31. How healthy are you feeling right now? |                 |                     | 0.643                |
| Excellent health                           | 15 (25.0)       | 7 (36.8)            |                      |
| Very good health                           | 26 (43.3)       | 5 (26.3)            |                      |
| Good health                                | 10 (16.7)       | 5 (26.3)            |                      |
| Fair health                                | 6 (10.0)        | 2 (10.5)            |                      |
| Poor health                                | 2 (3.3)         | 0 (0.0)             |                      |
| Declined                                   | 1 (1.7)         | 0 (0.0)             |                      |
| 32a. Is your mother alive?                 |                 |                     | 1.000                |
| Yes                                        | 59 (98.3)       | 19 (100.0)          |                      |
| No                                         | 1 (1.7)         | 0 (0.0)             |                      |
| 32b. Is your father alive?                 |                 |                     | 0.232                |
| Yes                                        | 56 (93.3)       | 16 (84.2)           |                      |
| No                                         | 3 (5.0)         | 2 (10.5)            |                      |
| Do not know                                | 1 (1.7)         | 1 (5.3)             |                      |

<sup>a</sup>: One unknown race was excluded.

<sup>b</sup>: Pearson chi-square test or Fisher' exact test.

<sup>c</sup>: Bonferroni corrected significant level is 0.05/8=0.006.

<sup>d</sup>: Bonferroni corrected significant level is 0.05/4=0.013.

<sup>e</sup>: Bonferroni corrected significant level is 0.05/10=0.005.

<sup>f</sup>: Bonferroni corrected significant level is 0.05/4=0.013.

**eTable 5. Frequencies of Adolescent Responses for Survey by Poverty at Session 1 (N=78<sup>a</sup>)**

| Question                                                                                                                                                                               | Poverty (N=21) | Non-Poverty (N=57) | P-value <sup>b</sup> |
|----------------------------------------------------------------------------------------------------------------------------------------------------------------------------------------|----------------|--------------------|----------------------|
|                                                                                                                                                                                        | N (%)          | N (%)              |                      |
| 1. Have you ever written down any thoughts about your future health plans?                                                                                                             |                |                    | 0.294                |
| Yes, definitely                                                                                                                                                                        | 2 (9.5)        | 1 (1.8)            |                      |
| Very probably                                                                                                                                                                          | 1 (4.8)        | 0 (0.0)            |                      |
| Probably                                                                                                                                                                               | 1 (4.8)        | 4 (7.0)            |                      |
| Probably not                                                                                                                                                                           | 3 (14.3)       | 8 (14.0)           |                      |
| Definitely no                                                                                                                                                                          | 13 (61.9)      | 42 (73.7)          |                      |
| Do not know                                                                                                                                                                            | 1 (4.8)        | 2 (3.5)            |                      |
| 2a. Have you ever heard about and completed a Health Care Power of Attorney (HCPA), in which you name someone to make decisions about your health care in case you could not?          |                |                    | 0.347                |
| Have heard about and completed                                                                                                                                                         | 0 (0.0)        | 2 (3.5)            |                      |
| Have heard about but not completed                                                                                                                                                     | 10 (47.6)      | 25 (43.9)          |                      |
| Have not heard about                                                                                                                                                                   | 11 (52.4)      | 23 (40.4)          |                      |
| Do not know                                                                                                                                                                            | 0 (0.0)        | 7 (12.3)           |                      |
| 2b. Have you ever heard about and completed an Advance Directive or living will, such as the Five Wishes?                                                                              |                |                    | 0.800                |
| Have heard about and completed                                                                                                                                                         | 0 (0.0)        | 2 (3.5)            |                      |
| Have heard about but not completed                                                                                                                                                     | 10 (47.6)      | 20 (35.1)          |                      |
| Have not heard about                                                                                                                                                                   | 10 (47.6)      | 32 (56.1)          |                      |
| Do not know                                                                                                                                                                            | 1 (4.8)        | 3 (5.3)            |                      |
| 3a. Whether you have completed any advance directives/pre-plans or not, have you talked about your wishes for care at the end of life with anyone? Select all that apply. <sup>c</sup> |                |                    |                      |
| Spouse/partner                                                                                                                                                                         | 0 (0.0)        | 0 (0.0)            | -                    |
| Parents                                                                                                                                                                                | 5 (23.8)       | 20 (35.1)          | 0.344                |
| Siblings (brother/sister)                                                                                                                                                              | 3 (14.3)       | 6 (10.5)           | 0.696                |
| Friends                                                                                                                                                                                | 3 (14.3)       | 6 (10.5)           | 0.696                |
| Boyfriend/girlfriend                                                                                                                                                                   | 2 (9.5)        | 2 (3.5)            | 0.292                |
| Lawyer                                                                                                                                                                                 | 0 (0.0)        | 0 (0.0)            | -                    |
| Primary physician                                                                                                                                                                      | 0 (0.0)        | 1 (1.8)            | 1.000                |
| Clergy (such as minister, rabbi, iman etc.)                                                                                                                                            | 0 (0.0)        | 1 (1.8)            | 1.000                |
| Other                                                                                                                                                                                  | 0 (0.0)        | 1 (1.8)            | 1.000                |
| Have not talked with anyone                                                                                                                                                            | 14 (66.7)      | 34 (59.6)          | 0.572                |
| 3b. Do you have any children?                                                                                                                                                          |                |                    |                      |
| No                                                                                                                                                                                     | 21 (100.0)     | 57 (100.0)         | -                    |
| 4. If you were very ill and knew that you would not get better, who would you want to be involved in decisions about your end-of-life care? Select all that apply. <sup>d</sup>        |                |                    |                      |

**eTable 5. (continued) Frequencies of Adolescent Responses for Survey by Poverty at Session 1 (N=78<sup>a</sup>)**

| Question                                                                                                                                                                                 | Poverty<br>(N=21) | Non-Poverty<br>(N=57) | P-value <sup>b</sup> |
|------------------------------------------------------------------------------------------------------------------------------------------------------------------------------------------|-------------------|-----------------------|----------------------|
|                                                                                                                                                                                          | N (%)             | N (%)                 |                      |
| Myself                                                                                                                                                                                   | 13 (61.9)         | 38 (66.7)             | 0.695                |
| My family                                                                                                                                                                                | 20 (95.2)         | 55 (96.5)             | 1.000                |
| My doctor                                                                                                                                                                                | 11 (52.4)         | 33 (57.9)             | 0.663                |
| Someone else                                                                                                                                                                             | 3 (14.3)          | 4 (7.0)               | 0.379                |
| 5. When do you think it is the best time to bring up end-of-life decisions?                                                                                                              |                   |                       | 0.626                |
| Before getting sick, while healthy                                                                                                                                                       | 8 (38.1)          | 23 (40.4)             |                      |
| When first diagnosed with a life-threatening illness                                                                                                                                     | 4 (19.0)          | 7 (12.3)              |                      |
| When first sick from a life-threatening illness                                                                                                                                          | 2 (9.5)           | 4 (7.0)               |                      |
| When first hospitalized with a life-threatening illness                                                                                                                                  | 0 (0.0)           | 1 (1.8)               |                      |
| If dying                                                                                                                                                                                 | 0 (0.0)           | 4 (7.0)               |                      |
| All of the above                                                                                                                                                                         | 1 (4.8)           | 2 (3.5)               |                      |
| Never                                                                                                                                                                                    | 4 (19.0)          | 15 (26.3)             |                      |
| Other                                                                                                                                                                                    | 1 (4.8)           | 0 (0.0)               |                      |
| Do not know                                                                                                                                                                              | 1 (4.8)           | 1 (1.8)               |                      |
| 6. Who are the best people/best person on the treatment team to bring it up with you? Select all that apply. <sup>e</sup>                                                                |                   |                       |                      |
| Physician                                                                                                                                                                                | 12 (57.1)         | 36 (63.2)             | 0.628                |
| Nurse practitioner                                                                                                                                                                       | 5 (23.8)          | 20 (35.1)             | 0.344                |
| Nurse                                                                                                                                                                                    | 7 (33.3)          | 16 (28.1)             | 0.651                |
| Social worker                                                                                                                                                                            | 5 (23.8)          | 18 (31.6)             | 0.505                |
| Psychologist                                                                                                                                                                             | 3 (14.3)          | 10 (17.5)             | 1.000                |
| Case manager                                                                                                                                                                             | 1 (4.8)           | 4 (7.0)               | 1.000                |
| Chaplain                                                                                                                                                                                 | 2 (9.5)           | 3 (5.3)               | 0.607                |
| Patient advocate                                                                                                                                                                         | 2 (9.5)           | 5 (8.8)               | 1.000                |
| Other                                                                                                                                                                                    | 1 (4.8)           | 3 (5.3)               | 1.000                |
| Do not know                                                                                                                                                                              | 3 (14.3)          | 7 (12.3)              | 1.000                |
| 7. Do you believe that once you make an important medical decision, for example, to be put on a respirator, a machine that breathes for you, that you would be able to change your mind? |                   |                       | 0.609                |
| Yes, definitely                                                                                                                                                                          | 6 (28.6)          | 13 (22.8)             |                      |
| Very probably                                                                                                                                                                            | 3 (14.3)          | 8 (14.0)              |                      |
| Probably                                                                                                                                                                                 | 5 (23.8)          | 20 (35.1)             |                      |
| Probably not                                                                                                                                                                             | 6 (28.6)          | 9 (15.8)              |                      |
| Do not know                                                                                                                                                                              | 1 (4.8)           | 7 (12.3)              |                      |
| 8. Do you think your doctor or the hospital will respect your wishes, that is, do what you want about medical care?                                                                      |                   |                       | 0.221                |
| Yes, definitely                                                                                                                                                                          | 13 (61.9)         | 27 (47.4)             |                      |



**eTable 5. (continued) Frequencies of Adolescent Responses for Survey by Poverty at Session 1 (N=78<sup>a</sup>)**

| Question                                                                                                                     | Poverty (N=21) | Non-Poverty (N=57) | P-value <sup>b</sup> |
|------------------------------------------------------------------------------------------------------------------------------|----------------|--------------------|----------------------|
|                                                                                                                              | N (%)          | N (%)              |                      |
| Very probably                                                                                                                | 7 (33.3)       | 12 (21.1)          |                      |
| Probably                                                                                                                     | 1 (4.8)        | 11 (19.3)          |                      |
| Probably not                                                                                                                 | 0 (0.0)        | 4 (7.0)            |                      |
| Do not know                                                                                                                  | 0 (0.0)        | 3 (5.3)            |                      |
| 9. Do you think your parent/guardian/surrogate understands your wishes?                                                      |                |                    | 0.931                |
| Yes, definitely                                                                                                              | 10 (50.0)      | 30 (52.6)          |                      |
| Very probably                                                                                                                | 4 (20.0)       | 9 (15.8)           |                      |
| Probably                                                                                                                     | 5 (25.0)       | 10 (17.5)          |                      |
| Probably not                                                                                                                 | 1 (5.0)        | 4 (7.0)            |                      |
| Definitely no                                                                                                                | 0 (0.0)        | 1 (1.8)            |                      |
| Do not know                                                                                                                  | 0 (0.0)        | 3 (5.3)            |                      |
| 10. Do you think your parent/guardian/surrogate will respect your wishes, that is, do what you want about your medical care? |                |                    | 0.666                |
| Yes, definitely                                                                                                              | 9 (42.9)       | 31 (54.4)          |                      |
| Very probably                                                                                                                | 6 (28.6)       | 11 (19.3)          |                      |
| Probably                                                                                                                     | 5 (23.8)       | 9 (15.8)           |                      |
| Probably not                                                                                                                 | 1 (4.8)        | 3 (5.3)            |                      |
| Do not know                                                                                                                  | 0 (0.0)        | 3 (5.3)            |                      |
| 11. How often has death and dying been talked about in your family?                                                          |                |                    | 0.813                |
| Very often                                                                                                                   | 0 (0.0)        | 2 (3.5)            |                      |
| Often                                                                                                                        | 3 (14.3)       | 9 (15.8)           |                      |
| Occasionally                                                                                                                 | 8 (38.1)       | 18 (31.6)          |                      |
| Rarely                                                                                                                       | 9 (42.9)       | 21 (36.8)          |                      |
| Never                                                                                                                        | 0 (0.0)        | 5 (8.8)            |                      |
| Do not know                                                                                                                  | 1 (4.8)        | 2 (3.5)            |                      |
| 12. How comfortable are you talking about death?                                                                             |                |                    | 0.482                |
| Very comfortable                                                                                                             | 4 (19.0)       | 13 (22.8)          |                      |
| Somewhat comfortable                                                                                                         | 9 (42.9)       | 23 (40.4)          |                      |
| Neither comfortable or uncomfortable                                                                                         | 3 (14.3)       | 13 (22.8)          |                      |
| Not very comfortable                                                                                                         | 1 (4.8)        | 5 (8.8)            |                      |
| Not at all comfortable                                                                                                       | 3 (14.3)       | 2 (3.5)            |                      |
| Do not know                                                                                                                  | 1 (4.8)        | 1 (1.8)            |                      |
| 13. How likely are you to?                                                                                                   |                |                    |                      |
| 13a. Attend funerals or memorial services when a loved one, friend or classmate dies                                         |                |                    | 0.392                |
| Very likely                                                                                                                  | 19 (90.5)      | 40 (70.2)          |                      |

**eTable 5. (continued) Frequencies of Adolescent Responses for Survey by Poverty at Session 1 (N=78<sup>a</sup>)**

| Question                                                                                                          | Poverty<br>(N=21) | Non-Poverty<br>(N=57) | P-value <sup>b</sup> |
|-------------------------------------------------------------------------------------------------------------------|-------------------|-----------------------|----------------------|
|                                                                                                                   | N (%)             | N (%)                 |                      |
| Somewhat likely                                                                                                   | 1 (4.8)           | 11 (19.3)             |                      |
| Neither likely or unlikely                                                                                        | 1 (4.8)           | 1 (1.8)               |                      |
| Not very likely                                                                                                   | 0 (0.0)           | 1 (1.8)               |                      |
| Not at all likely                                                                                                 | 0 (0.0)           | 2 (3.5)               |                      |
| Do not know                                                                                                       | 0 (0.0)           | 2 (3.5)               |                      |
| 13b. Avoid medical checkups because you are afraid the doctor will find "something serious"                       |                   |                       | 0.035                |
| Very likely                                                                                                       | 0 (0.0)           | 2 (3.5)               |                      |
| Somewhat likely                                                                                                   | 4 (19.0)          | 7 (12.3)              |                      |
| Neither likely or unlikely                                                                                        | 2 (9.5)           | 1 (1.8)               |                      |
| Not very likely                                                                                                   | 0 (0.0)           | 11 (19.3)             |                      |
| Not at all likely                                                                                                 | 14 (66.7)         | 36 (63.2)             |                      |
| Do not know                                                                                                       | 1 (4.8)           | 0 (0.0)               |                      |
| 13c. Speak freely to loved ones about death and dying                                                             |                   |                       | 0.173                |
| Very likely                                                                                                       | 3 (14.3)          | 14 (24.6)             |                      |
| Somewhat likely                                                                                                   | 8 (38.1)          | 20 (35.1)             |                      |
| Neither likely or unlikely                                                                                        | 7 (33.3)          | 10 (17.5)             |                      |
| Not very likely                                                                                                   | 0 (0.0)           | 7 (12.3)              |                      |
| Not at all likely                                                                                                 | 2 (9.5)           | 6 (10.5)              |                      |
| Do not know                                                                                                       | 1 (4.8)           | 0 (0.0)               |                      |
| 13d. Visit or telephone a friend or relative who has recently lost a loved one in order to see how they are doing |                   |                       | 1.000                |
| Very likely                                                                                                       | 16 (76.2)         | 41 (71.9)             |                      |
| Somewhat likely                                                                                                   | 4 (19.0)          | 12 (21.1)             |                      |
| Neither likely or unlikely                                                                                        | 1 (4.8)           | 2 (3.5)               |                      |
| Not very likely                                                                                                   | 0 (0.0)           | 2 (3.5)               |                      |
| 13e. Preplan your own funeral, for example, choose someone to speak or choose the music you would want            |                   |                       | 0.429                |
| Very likely                                                                                                       | 8 (38.1)          | 18 (31.6)             |                      |
| Somewhat likely                                                                                                   | 4 (19.0)          | 11 (19.3)             |                      |
| Neither likely or unlikely                                                                                        | 6 (28.6)          | 7 (12.3)              |                      |
| Not very likely                                                                                                   | 1 (4.8)           | 8 (14.0)              |                      |
| Not at all likely                                                                                                 | 1 (4.8)           | 9 (15.8)              |                      |
| Do not know                                                                                                       | 1 (4.8)           | 4 (7.0)               |                      |
| 14. How afraid, if at all, are you of?                                                                            |                   |                       |                      |
| 14a. Dying from a long term illness                                                                               |                   |                       | 0.405                |
| Very afraid                                                                                                       | 3 (14.3)          | 6 (10.5)              |                      |
| Somewhat afraid                                                                                                   | 6 (28.6)          | 19 (33.3)             |                      |

**eTable 5. (continued) Frequencies of Adolescent Responses for Survey by Poverty at Session 1 (N=78<sup>a</sup>)**

| Question                                                        | Poverty<br>(N=21) | Non-<br>Poverty<br>(N=57) | P-value <sup>b</sup> |
|-----------------------------------------------------------------|-------------------|---------------------------|----------------------|
|                                                                 | N (%)             | N (%)                     |                      |
| Neither afraid nor not afraid                                   | 5 (23.8)          | 4 (7.0)                   |                      |
| Not very afraid                                                 | 3 (14.3)          | 13 (22.8)                 |                      |
| Not at all afraid                                               | 4 (19.0)          | 12 (21.1)                 |                      |
| Do not know                                                     | 0 (0.0)           | 3 (5.3)                   |                      |
| 14b. Dying suddenly, such as an accident, or being killed:      |                   |                           | 0.430                |
| Very afraid                                                     | 5 (23.8)          | 9 (15.8)                  |                      |
| Somewhat afraid                                                 | 7 (33.3)          | 18 (31.6)                 |                      |
| Neither afraid nor not afraid                                   | 2 (9.5)           | 11 (19.3)                 |                      |
| Not very afraid                                                 | 2 (9.5)           | 11 (19.3)                 |                      |
| Not at all afraid                                               | 4 (19.0)          | 8 (14.0)                  |                      |
| Do not know                                                     | 1 (4.8)           | 0 (0.0)                   |                      |
| 14c. Dying alone                                                |                   |                           | 0.142                |
| Very afraid                                                     | 9 (42.9)          | 15 (26.3)                 |                      |
| Somewhat afraid                                                 | 4 (19.0)          | 10 (17.5)                 |                      |
| Neither afraid nor not afraid                                   | 3 (14.3)          | 9 (15.8)                  |                      |
| Not very afraid                                                 | 0 (0.0)           | 10 (17.5)                 |                      |
| Not at all afraid                                               | 4 (19.0)          | 13 (22.8)                 |                      |
| Do not know                                                     | 1 (4.8)           | 0 (0.0)                   |                      |
| 14d. Dying in an institution such as a nursing home or hospital |                   |                           | 0.135                |
| Very afraid                                                     | 3 (14.3)          | 10 (17.5)                 |                      |
| Somewhat afraid                                                 | 3 (14.3)          | 9 (15.8)                  |                      |
| Neither afraid nor not afraid                                   | 6 (28.6)          | 8 (14.0)                  |                      |
| Not very afraid                                                 | 1 (4.8)           | 15 (26.3)                 |                      |
| Not at all afraid                                               | 6 (28.6)          | 14 (24.6)                 |                      |
| Do not know                                                     | 2 (9.5)           | 1 (1.8)                   |                      |
| 14e. Dying painfully                                            |                   |                           | 0.150                |
| Very afraid                                                     | 10 (47.6)         | 17 (29.8)                 |                      |
| Somewhat afraid                                                 | 6 (28.6)          | 19 (33.3)                 |                      |
| Neither afraid nor not afraid                                   | 1 (4.8)           | 5 (8.8)                   |                      |
| Not very afraid                                                 | 0 (0.0)           | 9 (15.8)                  |                      |
| Not at all afraid                                               | 3 (14.3)          | 7 (12.3)                  |                      |
| Do not know                                                     | 1 (4.8)           | 0 (0.0)                   |                      |
| 15. How strongly do you agree or disagree that?                 |                   |                           |                      |
| 15a. Dying is an important part of life                         |                   |                           | 0.003                |
| Strongly agree                                                  | 3 (14.3)          | 29 (50.9)                 |                      |
| Agree                                                           | 10 (47.6)         | 20 (35.1)                 |                      |
| Neither agree or disagree                                       | 6 (28.6)          | 3 (5.3)                   |                      |

**eTable 5. (continued) Frequencies of Adolescent Responses for Survey by Poverty at Session 1 (N=78<sup>a</sup>)**

| Question                                                                                                                   | Poverty<br>(N=21) | Non-Poverty<br>(N=57) | P-value <sup>b</sup> |
|----------------------------------------------------------------------------------------------------------------------------|-------------------|-----------------------|----------------------|
|                                                                                                                            | N (%)             | N (%)                 |                      |
| Disagree                                                                                                                   | 1 (4.8)           | 4 (7.0)               |                      |
| Strongly disagree                                                                                                          | 1 (4.8)           | 0 (0.0)               |                      |
| Do not know                                                                                                                | 0 (0.0)           | 1 (1.8)               |                      |
| 15b. If someone could tell me when I would die, I would want to know.                                                      |                   |                       | 0.851                |
| Strongly agree                                                                                                             | 6 (28.6)          | 9 (15.8)              |                      |
| Agree                                                                                                                      | 4 (19.0)          | 10 (17.5)             |                      |
| Neither agree or disagree                                                                                                  | 3 (14.3)          | 7 (12.3)              |                      |
| Disagree                                                                                                                   | 2 (9.5)           | 8 (14.0)              |                      |
| Strongly disagree                                                                                                          | 5 (23.8)          | 19 (33.3)             |                      |
| Do not know                                                                                                                | 1 (4.8)           | 4 (7.0)               |                      |
| 16. When you think about death and dying, how concerned are you that?                                                      |                   |                       |                      |
| 16a. The family's money won't last:                                                                                        |                   |                       | 0.137                |
| Very concerned                                                                                                             | 1 (4.8)           | 2 (3.5)               |                      |
| Concerned                                                                                                                  | 4 (19.0)          | 16 (28.1)             |                      |
| Neither concerned nor unconcerned                                                                                          | 5 (23.8)          | 14 (24.6)             |                      |
| Not concerned                                                                                                              | 4 (19.0)          | 9 (15.8)              |                      |
| Not at all concerned                                                                                                       | 3 (14.3)          | 15 (26.3)             |                      |
| Do not know                                                                                                                | 4 (19.0)          | 1 (1.8)               |                      |
| 16b. I will be a burden to, or overload, my family or friends.                                                             |                   |                       | 0.574                |
| Very concerned                                                                                                             | 2 (9.5)           | 11 (19.3)             |                      |
| Concerned                                                                                                                  | 10 (47.6)         | 15 (26.3)             |                      |
| Neither concerned nor unconcerned                                                                                          | 1 (4.8)           | 6 (10.5)              |                      |
| Not concerned                                                                                                              | 5 (23.8)          | 14 (24.6)             |                      |
| Not at all concerned                                                                                                       | 2 (9.5)           | 9 (15.8)              |                      |
| Do not know                                                                                                                | 1 (4.8)           | 2 (3.5)               |                      |
| 17. Which of the following health problems, if any, do you think are worse than death? Select all that apply. <sup>f</sup> |                   |                       |                      |
| Living with great pain                                                                                                     | 7 (33.3)          | 25 (43.9)             | 0.402                |
| Total physical dependency on others, for example, being in a wheelchair                                                    | 2 (9.5)           | 20 (35.1)             | 0.045                |
| Not being able to communicate my wishes and/or care to family members, for example, being in a coma Checked                | 15 (71.4)         | 31 (54.4)             | 0.175                |
| None are worse than death                                                                                                  | 4 (19.0)          | 17 (29.8)             | 0.402                |
| 18. How important would each of the following be to you if you were dealing with your own dying?                           |                   |                       |                      |
| 18a. Family/friends visiting you                                                                                           |                   |                       | 0.876                |
| Very important                                                                                                             | 18 (85.7)         | 49 (86.0)             |                      |

**eTable 5. (continued) Frequencies of Adolescent Responses for Survey by Poverty at Session 1 (N=78<sup>a</sup>)**

| Question                                                                                                                               | Poverty<br>(N=21) | Non-Poverty<br>(N=57) | P-value <sup>b</sup> |
|----------------------------------------------------------------------------------------------------------------------------------------|-------------------|-----------------------|----------------------|
|                                                                                                                                        | N (%)             | N (%)                 |                      |
| Somewhat important                                                                                                                     | 2 (9.5)           | 6 (10.5)              |                      |
| Neither important nor unimportant                                                                                                      | 1 (4.8)           | 1 (1.8)               |                      |
| Do not know                                                                                                                            | 0 (0.0)           | 1 (1.8)               |                      |
| 18b. Being able to stay in your own home                                                                                               |                   |                       | 0.385                |
| Very important                                                                                                                         | 5 (23.8)          | 22 (38.6)             |                      |
| Somewhat important                                                                                                                     | 10 (47.6)         | 22 (38.6)             |                      |
| Neither important nor unimportant                                                                                                      | 3 (14.3)          | 4 (7.0)               |                      |
| Not very important                                                                                                                     | 2 (9.5)           | 7 (12.3)              |                      |
| Not at all important                                                                                                                   | 0 (0.0)           | 2 (3.5)               |                      |
| Do not know                                                                                                                            | 1 (4.8)           | 0 (0.0)               |                      |
| 18c. Honest answers from your doctor                                                                                                   |                   |                       | 0.469                |
| Very important                                                                                                                         | 20 (95.2)         | 56 (98.2)             |                      |
| Somewhat important                                                                                                                     | 1 (4.8)           | 1 (1.8)               |                      |
| 18d. Comfort from church services or persons such as a minister, priest, imam, or rabbi                                                |                   |                       | 0.012                |
| Very important                                                                                                                         | 4 (19.0)          | 26 (45.6)             |                      |
| Somewhat important                                                                                                                     | 10 (47.6)         | 12 (21.1)             |                      |
| Neither important nor unimportant                                                                                                      | 4 (19.0)          | 4 (7.0)               |                      |
| Not very important                                                                                                                     | 0 (0.0)           | 5 (8.8)               |                      |
| Not at all important                                                                                                                   | 2 (9.5)           | 10 (17.5)             |                      |
| Do not know                                                                                                                            | 1 (4.8)           | 0 (0.0)               |                      |
| 18e. Planning your own funeral                                                                                                         |                   |                       | 0.491                |
| Very important                                                                                                                         | 4 (19.0)          | 12 (21.1)             |                      |
| Somewhat important                                                                                                                     | 6 (28.6)          | 21 (36.8)             |                      |
| Neither important nor unimportant                                                                                                      | 8 (38.1)          | 10 (17.5)             |                      |
| Not very important                                                                                                                     | 2 (9.5)           | 9 (15.8)              |                      |
| Not at all important                                                                                                                   | 0 (0.0)           | 3 (5.3)               |                      |
| Do not know                                                                                                                            | 1 (4.8)           | 2 (3.5)               |                      |
| 18f. Being able to complete an advance directive that would let loved ones know your wishes, if you were unable to speak for yourself. |                   |                       | 0.121                |
| Very important                                                                                                                         | 16 (76.2)         | 27 (47.4)             |                      |
| Somewhat important                                                                                                                     | 4 (19.0)          | 23 (40.4)             |                      |
| Neither important nor unimportant                                                                                                      | 0 (0.0)           | 4 (7.0)               |                      |
| Do not know                                                                                                                            | 1 (4.8)           | 3 (5.3)               |                      |
| 18g. Fulfilling personal goals/pleasures                                                                                               |                   |                       | 0.123                |
| Very important                                                                                                                         | 11 (52.4)         | 43 (75.4)             |                      |
| Somewhat important                                                                                                                     | 9 (42.9)          | 12 (21.1)             |                      |

**eTable 5. (continued) Frequencies of Adolescent Responses for Survey by Poverty at Session 1 (N=78<sup>a</sup>)**

| Question                                                                          | Poverty<br>(N=21) | Non-Poverty<br>(N=57) | P-value <sup>b</sup> |
|-----------------------------------------------------------------------------------|-------------------|-----------------------|----------------------|
|                                                                                   | N (%)             | N (%)                 |                      |
| Neither important nor unimportant                                                 | 1 (4.8)           | 1 (1.8)               |                      |
| Not very important                                                                | 0 (0.0)           | 1 (1.8)               |                      |
| 18h. Reviewing your life history with your family                                 |                   |                       | 0.845                |
| Very important                                                                    | 8 (38.1)          | 25 (43.9)             |                      |
| Somewhat important                                                                | 6 (28.6)          | 17 (29.8)             |                      |
| Neither important nor unimportant                                                 | 5 (23.8)          | 8 (14.0)              |                      |
| Not very important                                                                | 2 (9.5)           | 6 (10.5)              |                      |
| Do not know                                                                       | 0 (0.0)           | 1 (1.8)               |                      |
| 18i. Having health care professionals visit you at your home                      |                   |                       | 0.586                |
| Very important                                                                    | 6 (28.6)          | 18 (31.6)             |                      |
| Somewhat important                                                                | 8 (38.1)          | 25 (43.9)             |                      |
| Neither important nor unimportant                                                 | 5 (23.8)          | 12 (21.1)             |                      |
| Not very important                                                                | 1 (4.8)           | 1 (1.8)               |                      |
| Not at all important                                                              | 0 (0.0)           | 1 (1.8)               |                      |
| Do not know                                                                       | 1 (4.8)           | 0 (0.0)               |                      |
| 18j. Understanding your treatment choices                                         |                   |                       | 0.363                |
| Very important                                                                    | 21 (100.0)        | 50 (87.7)             |                      |
| Somewhat important                                                                | 0 (0.0)           | 5 (8.8)               |                      |
| Do not know                                                                       | 0 (0.0)           | 2 (3.5)               |                      |
| 19. How important are each of the following is to you when you think about dying? |                   |                       |                      |
| 19a. Being physically comfortable                                                 |                   |                       | 0.264                |
| Very important                                                                    | 15 (71.4)         | 33 (57.9)             |                      |
| Somewhat important                                                                | 4 (19.0)          | 20 (35.1)             |                      |
| Neither important nor unimportant                                                 | 1 (4.8)           | 2 (3.5)               |                      |
| Not very important                                                                | 1 (4.8)           | 0 (0.0)               |                      |
| Not at all important                                                              | 0 (0.0)           | 2 (3.5)               |                      |
| 19b. Being free from pain                                                         |                   |                       | 0.410                |
| Very important                                                                    | 15 (71.4)         | 35 (61.4)             |                      |
| Somewhat important                                                                | 4 (19.0)          | 13 (22.8)             |                      |
| Neither important nor unimportant                                                 | 0 (0.0)           | 5 (8.8)               |                      |
| Not very important                                                                | 2 (9.5)           | 1 (1.8)               |                      |
| Not at all important                                                              | 0 (0.0)           | 2 (3.5)               |                      |
| Do not know                                                                       | 0 (0.0)           | 1 (1.8)               |                      |
| 19c. Saying everything I want to say to people in my family                       |                   |                       | 0.244                |
| Very important                                                                    | 14 (70.0)         | 47 (82.5)             |                      |
| Somewhat important                                                                | 5 (25.0)          | 9 (15.8)              |                      |
| Neither important nor unimportant                                                 | 1 (5.0)           | 0 (0.0)               |                      |

**eTable 5. (continued) Frequencies of Adolescent Responses for Survey by Poverty at Session 1 (N=78<sup>a</sup>)**

| Question                                                        | Poverty<br>(N=21) | Non-<br>Poverty<br>(N=57) | P-value <sup>b</sup> |
|-----------------------------------------------------------------|-------------------|---------------------------|----------------------|
|                                                                 | N (%)             | N (%)                     |                      |
| Not at all important                                            | 0 (0.0)           | 1 (1.8)                   |                      |
| 19d. Being at peace spiritually                                 |                   |                           | 0.095                |
| Very important                                                  | 13 (61.9)         | 45 (78.9)                 |                      |
| Somewhat important                                              | 5 (23.8)          | 9 (15.8)                  |                      |
| Neither important nor unimportant                               | 0 (0.0)           | 2 (3.5)                   |                      |
| Not very important                                              | 1 (4.8)           | 1 (1.8)                   |                      |
| Do not know                                                     | 2 (9.5)           | 0 (0.0)                   |                      |
| 19e. Not being a burden to loved ones                           |                   |                           | 0.464                |
| Very important                                                  | 13 (61.9)         | 39 (68.4)                 |                      |
| Somewhat important                                              | 5 (23.8)          | 10 (17.5)                 |                      |
| Neither important nor unimportant                               | 1 (4.8)           | 4 (7.0)                   |                      |
| Not very important                                              | 0 (0.0)           | 3 (5.3)                   |                      |
| Do not know                                                     | 2 (9.5)           | 1 (1.8)                   |                      |
| 19f. Knowing how to say good bye                                |                   |                           | 0.880                |
| Very important                                                  | 16 (76.2)         | 42 (73.7)                 |                      |
| Somewhat important                                              | 3 (14.3)          | 8 (14.0)                  |                      |
| Neither important nor unimportant                               | 1 (4.8)           | 3 (5.3)                   |                      |
| Not very important                                              | 1 (4.8)           | 1 (1.8)                   |                      |
| Do not know                                                     | 0 (0.0)           | 3 (5.3)                   |                      |
| 19g. Having a sense of my own worth or value                    |                   |                           | 0.445                |
| Very important                                                  | 12 (57.1)         | 36 (63.2)                 |                      |
| Somewhat important                                              | 6 (28.6)          | 17 (29.8)                 |                      |
| Neither important nor unimportant                               | 1 (4.8)           | 3 (5.3)                   |                      |
| Do not know                                                     | 2 (9.5)           | 1 (1.8)                   |                      |
| 19h. Being off machines that extend life, such as life support. |                   |                           | 0.458                |
| Very important                                                  | 6 (28.6)          | 17 (29.8)                 |                      |
| Somewhat important                                              | 10 (47.6)         | 14 (24.6)                 |                      |
| Neither important nor unimportant                               | 3 (14.3)          | 17 (29.8)                 |                      |
| Not very important                                              | 1 (4.8)           | 3 (5.3)                   |                      |
| Not at all important                                            | 0 (0.0)           | 2 (3.5)                   |                      |
| Do not know                                                     | 1 (4.8)           | 4 (7.0)                   |                      |
| 19i. Dying a natural death                                      |                   |                           | 0.173                |
| Very important                                                  | 6 (28.6)          | 19 (33.3)                 |                      |
| Somewhat important                                              | 11 (52.4)         | 12 (21.1)                 |                      |
| Neither important nor unimportant                               | 3 (14.3)          | 15 (26.3)                 |                      |
| Not very important                                              | 1 (4.8)           | 5 (8.8)                   |                      |
| Not at all important                                            | 0 (0.0)           | 2 (3.5)                   |                      |

**eTable 5. (continued) Frequencies of Adolescent Responses for Survey by Poverty at Session 1 (N=78<sup>a</sup>)**

| Question                                                                                                                                                          | Poverty<br>(N=21) | Non-Poverty<br>(N=57) | P-value <sup>b</sup> |
|-------------------------------------------------------------------------------------------------------------------------------------------------------------------|-------------------|-----------------------|----------------------|
|                                                                                                                                                                   | N (%)             | N (%)                 |                      |
| Do not know                                                                                                                                                       | 0 (0.0)           | 4 (7.0)               |                      |
| 20. If death were likely to happen in the next few weeks, and you could choose where to die, where would you MOST want to die?                                    |                   |                       | 0.546                |
| At home without hospice                                                                                                                                           | 9 (42.9)          | 14 (24.6)             |                      |
| At home in hospice                                                                                                                                                | 4 (19.0)          | 16 (28.1)             |                      |
| In a hospital                                                                                                                                                     | 1 (4.8)           | 8 (14.0)              |                      |
| No preference                                                                                                                                                     | 3 (14.3)          | 8 (14.0)              |                      |
| Do not know                                                                                                                                                       | 4 (19.0)          | 11 (19.3)             |                      |
| 21. Below are some statements related to pain near the end-of-life that have been expressed by people. How strongly do you agree or disagree with each statement? |                   |                       |                      |
| 21a. I am afraid the doctor may not believe I am in pain and treat my pain                                                                                        |                   |                       | 0.454                |
| Strongly agree                                                                                                                                                    | 0 (0.0)           | 2 (3.5)               |                      |
| Agree                                                                                                                                                             | 6 (28.6)          | 7 (12.3)              |                      |
| Neither agree or disagree                                                                                                                                         | 4 (19.0)          | 6 (10.5)              |                      |
| Disagree                                                                                                                                                          | 6 (28.6)          | 23 (40.4)             |                      |
| Strongly disagree                                                                                                                                                 | 4 (19.0)          | 14 (24.6)             |                      |
| Do not know                                                                                                                                                       | 1 (4.8)           | 5 (8.8)               |                      |
| 21b. I would only take pain medicines when the pain is severe                                                                                                     |                   |                       | 0.120                |
| Strongly agree                                                                                                                                                    | 9 (42.9)          | 16 (28.1)             |                      |
| Agree                                                                                                                                                             | 6 (28.6)          | 21 (36.8)             |                      |
| Neither agree or disagree                                                                                                                                         | 0 (0.0)           | 9 (15.8)              |                      |
| Disagree                                                                                                                                                          | 5 (23.8)          | 10 (17.5)             |                      |
| Strongly disagree                                                                                                                                                 | 1 (4.8)           | 0 (0.0)               |                      |
| Do not know                                                                                                                                                       | 0 (0.0)           | 1 (1.8)               |                      |
| 21c. I am afraid I will become addicted to the pain medicines over time                                                                                           |                   |                       | 0.805                |
| Strongly agree                                                                                                                                                    | 0 (0.0)           | 3 (5.3)               |                      |
| Agree                                                                                                                                                             | 6 (28.6)          | 9 (15.8)              |                      |
| Neither agree or disagree                                                                                                                                         | 1 (4.8)           | 4 (7.0)               |                      |
| Disagree                                                                                                                                                          | 7 (33.3)          | 17 (29.8)             |                      |
| Strongly disagree                                                                                                                                                 | 6 (28.6)          | 21 (36.8)             |                      |
| Do not know                                                                                                                                                       | 1 (4.8)           | 3 (5.3)               |                      |
| 21d. I would take the lowest amount of medicine possible to save larger doses for later when the pain is worse                                                    |                   |                       | 0.877                |
| Strongly agree                                                                                                                                                    | 4 (19.0)          | 11 (19.3)             |                      |
| Agree                                                                                                                                                             | 8 (38.1)          | 22 (38.6)             |                      |
| Neither agree or disagree                                                                                                                                         | 4 (19.0)          | 8 (14.0)              |                      |



**eTable 5. (continued) Frequencies of Adolescent Responses for Survey by Poverty at Session 1 (N=78<sup>a</sup>)**

| Question                                                                                                      | Poverty<br>(N=21) | Non-Poverty<br>(N=57) | P-value <sup>b</sup> |
|---------------------------------------------------------------------------------------------------------------|-------------------|-----------------------|----------------------|
|                                                                                                               | N (%)             | N (%)                 |                      |
| Disagree                                                                                                      | 4 (19.0)          | 7 (12.3)              |                      |
| Strongly disagree                                                                                             | 1 (4.8)           | 7 (12.3)              |                      |
| Do not know                                                                                                   | 0 (0.0)           | 2 (3.5)               |                      |
| 21e. I am afraid I would be given too much pain medicine                                                      |                   |                       | 0.214                |
| Strongly agree                                                                                                | 0 (0.0)           | 6 (10.5)              |                      |
| Agree                                                                                                         | 6 (28.6)          | 8 (14.0)              |                      |
| Neither agree or disagree                                                                                     | 4 (19.0)          | 4 (7.0)               |                      |
| Disagree                                                                                                      | 7 (33.3)          | 22 (38.6)             |                      |
| Strongly disagree                                                                                             | 4 (19.0)          | 14 (24.6)             |                      |
| Do not know                                                                                                   | 0 (0.0)           | 3 (5.3)               |                      |
| 22. Have you heard of hospice services?                                                                       |                   |                       | 0.050                |
| Yes                                                                                                           | 11 (52.4)         | 43 (75.4)             |                      |
| No                                                                                                            | 10 (47.6)         | 14 (24.6)             |                      |
| 23. How did you learn about hospice services? (N=56)                                                          |                   |                       | 1.000                |
| I know someone who used hospice services                                                                      | 6 (54.5)          | 21 (48.8)             |                      |
| I heard from a health care professional                                                                       | 1 (9.1)           | 3 (7.0)               |                      |
| I read literature/newspaper/TV/radio/other media                                                              | 1 (9.1)           | 6 (14.0)              |                      |
| I heard from others                                                                                           | 3 (27.3)          | 13 (30.2)             |                      |
| 24. If you were dying, would you want hospice support? (N=56)                                                 |                   |                       | 0.446                |
| Yes                                                                                                           | 3 (27.3)          | 21 (48.8)             |                      |
| No                                                                                                            | 1 (9.1)           | 5 (11.6)              |                      |
| Don't know/not sure                                                                                           | 7 (63.6)          | 17 (39.5)             |                      |
| 25. Do you consider yourself religious/spiritual?                                                             |                   |                       | 0.073                |
| Very religious/spiritual                                                                                      | 3 (14.3)          | 18 (31.6)             |                      |
| Somewhat religious/spiritual                                                                                  | 9 (42.9)          | 28 (49.1)             |                      |
| Not very religious/spiritual                                                                                  | 5 (23.8)          | 4 (7.0)               |                      |
| Not religious/spiritual                                                                                       | 3 (14.3)          | 7 (12.3)              |                      |
| Declined                                                                                                      | 1 (4.8)           | 0 (0.0)               |                      |
| 26. How often do you attend religious or spiritual services? (N=69)                                           |                   |                       | 0.650                |
| Always                                                                                                        | 1 (5.9)           | 5 (10.0)              |                      |
| Very often                                                                                                    | 2 (11.8)          | 14 (28.0)             |                      |
| Sometimes                                                                                                     | 10 (58.8)         | 21 (42.0)             |                      |
| Rarely                                                                                                        | 3 (17.6)          | 8 (16.0)              |                      |
| Never                                                                                                         | 1 (5.9)           | 2 (4.0)               |                      |
| 27. How often does religion or spirituality help you face your fears or do what you were afraid to do? (N=69) |                   |                       | 0.330                |
| Everyday                                                                                                      | 2 (11.8)          | 16 (32.0)             |                      |

**eTable 5. (continued) Frequencies of Adolescent Responses for Survey by Poverty at Session 1 (N=78<sup>a</sup>)**

| Question                                        | Poverty (N=21) | Non-Poverty (N=57) | P-value <sup>b</sup> |
|-------------------------------------------------|----------------|--------------------|----------------------|
|                                                 | N (%)          | N (%)              |                      |
| A few times a week                              | 7 (41.2)       | 10 (20.0)          |                      |
| A few times a month                             | 4 (23.5)       | 13 (26.0)          |                      |
| Rarely                                          | 3 (17.6)       | 8 (16.0)           |                      |
| Never                                           | 1 (5.9)        | 3 (6.0)            |                      |
| 30. HOW MANY NIGHTS did you stay in a hospital? |                |                    | 0.413                |
| 0                                               | 19 (90.5)      | 50 (87.7)          |                      |
| 1-2                                             | 0 (0.0)        | 1 (1.8)            |                      |
| 3-5                                             | 0 (0.0)        | 4 (7.0)            |                      |
| 6-10                                            | 2 (9.5)        | 1 (1.8)            |                      |
| >20                                             | 0 (0.0)        | 1 (1.8)            |                      |
| 31. How healthy are you feeling right now?      |                |                    | 0.671                |
| Excellent health                                | 4 (19.0)       | 18 (31.6)          |                      |
| Very good health                                | 10 (47.6)      | 20 (35.1)          |                      |
| Good health                                     | 3 (14.3)       | 11 (19.3)          |                      |
| Fair health                                     | 3 (14.3)       | 6 (10.5)           |                      |
| Poor health                                     | 1 (4.8)        | 1 (1.8)            |                      |
| Declined                                        | 0 (0.0)        | 1 (1.8)            |                      |
| 32a. Is your mother alive?                      |                |                    | 1.000                |
| Yes                                             | 21 (100.0)     | 56 (98.2)          |                      |
| No                                              | 0 (0.0)        | 1 (1.8)            |                      |
| 32b. Is your father alive?                      |                |                    | 0.794                |
| Yes                                             | 19 (90.5)      | 52 (91.2)          |                      |
| No                                              | 1 (4.8)        | 4 (7.0)            |                      |
| Do not know                                     | 1 (4.8)        | 1 (1.8)            |                      |

<sup>a</sup>: Two unknown poverty cases was excluded.

<sup>b</sup>: Pearson chi-square test or Fisher' exact test.

<sup>c</sup>: Bonferroni corrected significant level is 0.05/8=0.006.

<sup>d</sup>: Bonferroni corrected significant level is 0.05/4=0.013.

<sup>e</sup>: Bonferroni corrected significant level is 0.05/10=0.005.

<sup>f</sup>: Bonferroni corrected significant level is 0.05/4=0.013.

| <b>eTable 6. The Congruence on End of Life Needs for Adolescents Living with Cancer Between Adolescents' and Families' Perception of What They Thought their Adolescents Preferred (N=80 dyads)</b>                                                                                                                                                                                                                                                                                                                                                                                                                                                                                |                         |                          |
|------------------------------------------------------------------------------------------------------------------------------------------------------------------------------------------------------------------------------------------------------------------------------------------------------------------------------------------------------------------------------------------------------------------------------------------------------------------------------------------------------------------------------------------------------------------------------------------------------------------------------------------------------------------------------------|-------------------------|--------------------------|
| <b>Question<sup>a</sup></b>                                                                                                                                                                                                                                                                                                                                                                                                                                                                                                                                                                                                                                                        | <b>Congruence N (%)</b> | <b>PABAK<sup>b</sup></b> |
| How comfortable are you talking about death?                                                                                                                                                                                                                                                                                                                                                                                                                                                                                                                                                                                                                                       |                         |                          |
| Comfortable                                                                                                                                                                                                                                                                                                                                                                                                                                                                                                                                                                                                                                                                        | 23 (28.8)               | 0.05                     |
| Otherwise                                                                                                                                                                                                                                                                                                                                                                                                                                                                                                                                                                                                                                                                          | 19 (23.8)               |                          |
| When you think about death and dying, how concerned are you that you will be a burden to, or overload, my family or friends?                                                                                                                                                                                                                                                                                                                                                                                                                                                                                                                                                       |                         |                          |
| Concerned                                                                                                                                                                                                                                                                                                                                                                                                                                                                                                                                                                                                                                                                          | 20 (25.0)               | 0.08                     |
| Otherwise                                                                                                                                                                                                                                                                                                                                                                                                                                                                                                                                                                                                                                                                          | 23 (28.8)               |                          |
| How strongly do you agree or disagree that if someone could tell me when I would die, I would want to know?                                                                                                                                                                                                                                                                                                                                                                                                                                                                                                                                                                        |                         |                          |
| Agree                                                                                                                                                                                                                                                                                                                                                                                                                                                                                                                                                                                                                                                                              | 14 (17.5)               | 0.18                     |
| Otherwise                                                                                                                                                                                                                                                                                                                                                                                                                                                                                                                                                                                                                                                                          | 33 (41.3)               |                          |
| I am afraid the doctor may not believe I am in pain and treat my pain.                                                                                                                                                                                                                                                                                                                                                                                                                                                                                                                                                                                                             |                         |                          |
| Agree                                                                                                                                                                                                                                                                                                                                                                                                                                                                                                                                                                                                                                                                              | 6 (7.5)                 | 0.48                     |
| Otherwise                                                                                                                                                                                                                                                                                                                                                                                                                                                                                                                                                                                                                                                                          | 53 (66.3)               |                          |
| I would only take pain medicines when the pain is severe.                                                                                                                                                                                                                                                                                                                                                                                                                                                                                                                                                                                                                          |                         |                          |
| Agree                                                                                                                                                                                                                                                                                                                                                                                                                                                                                                                                                                                                                                                                              | 44 (55.0)               | 0.33                     |
| Otherwise                                                                                                                                                                                                                                                                                                                                                                                                                                                                                                                                                                                                                                                                          | 9 (11.3)                |                          |
| I am afraid I will become addicted to the pain medicines over time.                                                                                                                                                                                                                                                                                                                                                                                                                                                                                                                                                                                                                |                         |                          |
| Agree                                                                                                                                                                                                                                                                                                                                                                                                                                                                                                                                                                                                                                                                              | 10 (12.5)               | 0.25                     |
| Otherwise                                                                                                                                                                                                                                                                                                                                                                                                                                                                                                                                                                                                                                                                          | 40 (50.0)               |                          |
| I would take the lowest amount of medicine possible to save larger doses for later when the pain is worse.                                                                                                                                                                                                                                                                                                                                                                                                                                                                                                                                                                         |                         |                          |
| Agree                                                                                                                                                                                                                                                                                                                                                                                                                                                                                                                                                                                                                                                                              | 33 (41.3)               | 0.18                     |
| Otherwise                                                                                                                                                                                                                                                                                                                                                                                                                                                                                                                                                                                                                                                                          | 14 (17.5)               |                          |
| <sup>a</sup> : "Comfortable" included Very comfortable/Somewhat comfortable; "Otherwise" included Neither comfortable nor uncomfortable/Not very comfortable/Not at all comfortable/Do not know.<br>"Concerned" included Very concerned/Concerned; "Otherwise" included Neither concerned nor unconcerned/Not concerned/Not at all concerned/Do not know.<br>"Agree" included Strongly agree/Agree; "Otherwise" included Neither agree nor disagree/Disagree/ Strongly disagree/Do not know.<br><sup>b</sup> : PABAK: The prevalence adjusted bias adjusted Kappa: Less than 0.40 = poor; Between 0.40 – 0.59 = fair, Between 0.60 – 0.74 = good; Between 0.75 – 1.00 = excellent. |                         |                          |
